# Supplementary material for: One-pot synthesis of tetracyclic fused imidazo[1,2-a]pyridines via a three-component reaction
Source: PubMed Central journal article supplement (PMC4979633; doi:10.3762/bjoc.12.145), 2016-07-18
Supplement: Beilstein_J_Org_Chem-12-1487-s001.pdf [file Beilstein_J_Org_Chem-12-1487-s001.pdf]

**Supporting Information**  
**for**  
**One-pot synthesis of tetracyclic fused imidazo[1,2-a]pyridines via**  
**a three-component reaction**

Bo Yang, Chuanye Tao, Taofeng Shao, Jianxian Gong\* and Chao Che\*

Address: Laboratory of Chemical Genomics, Engineering Laboratory for Chiral Drug Synthesis, School of Chemical Biology and Biotechnology, Peking University Shenzhen Graduate School, Shenzhen 518055, China

Email: Jianxian Gong\* - [gongjx@pku.edu.cn](mailto:gongjx@pku.edu.cn); Chao Che\* [chec@pkusz.edu.cn](mailto:chec@pkusz.edu.cn)

\*Corresponding author

Experimental procedures, characterization and spectral data for  
synthesized compounds and X-ray data for compound **10**

## General Information

Unless noted otherwise, all reactions were performed under a nitrogen atmosphere, and materials obtained from commercial suppliers were used without further purification.  $^1\text{H}$  NMR spectra were recorded on a 300 MHz, 400 MHz or 500 MHz spectrometer using residual solvent signal (DMSO  $\delta = 2.50$  ppm) as internal standard. All coupling constants are reported in hertz (Hz).  $^{13}\text{C}$  NMR spectra were recorded on the same instruments, and chemical shifts were measured relative to solvent resonances (DMSO  $\delta = 39.9$  ppm). High-resolution mass spectra were obtained on a quadrupole time-of-flight (QqTOF) mass spectrometer utilizing electrospray ionization (ESI) method.

## Typical procedure for the multicomponent reaction

To a solution of isatin **3** (1.0 mmol), 2-aminopyridine **2** (1.35 mmol) and isocyanide **4** (1.35 mmol) in 4 mL of *n*-butyl alcohol was added  $\text{HClO}_4$  (1.0 mmol), and the reaction mixture was stirred under reflux for 8 h. After cooling to room temperature, the precipitate was collected by filtration, rinsed with ethanol and dried to afford the target compound **1**.

*13-(tert-Butylamino)-6-oxo-5,6-dihydropyrido[2',1':2,3]imidazo[1,5-c]quinazolin-12-ium perchlorate (1a)*: 171 mg (42%) as a slight yellow solid; mp 252.3–253.7 °C; <sup>1</sup>H NMR (400 MHz, DMSO-*d*<sub>6</sub>) δ 1.25 (s, 9H), 5.63 (s, 1H), 7.35 (d, *J* = 8.4 Hz, 1H), 7.41 (t, *J* = 7.2 Hz, 1H), 7.61–7.65 (m, 1H), 7.88–7.92 (m, 1H), 8.27–8.32 (m, 1H), 8.70 (d, *J* = 7.2 Hz, 1H), 8.95 (d, *J* = 8.8 Hz, 1H), 9.14 (d, *J* = 6.8 Hz, 1H), 12.29 (s, 1H); <sup>13</sup>C NMR (75 MHz, DMSO-*d*<sub>6</sub>) δ 30.4, 58.1, 110.7, 115.2, 117.5, 119.8, 123.1, 123.3, 125.3, 125.6, 127.3, 131.9, 134.7, 135.8, 137.2, 145.0; HRMS (*m/z*, ESI) calc. for C<sub>18</sub>H<sub>19</sub>N<sub>4</sub>O (+) 307.1553, found 307.1552.

*13-(tert-Butylamino)-10-chloro-6-oxo-5,6-dihydropyrido[2',1':2,3]imidazo[1,5-c]quinazolin-12-ium perchlorate (1b)*: 234 mg (53%) as a slight yellow solid; mp 248.8–250.6 °C; <sup>1</sup>H NMR (400 MHz, DMSO-*d*<sub>6</sub>) δ 1.25 (s, 9H), 5.69 (s, 1H), 7.40–7.43 (m, 2H), 7.62–7.66 (m, 1H), 8.35 (dd, *J* = 2.0, 9.6 Hz, 1H), 8.69 (dd, *J* = 1.2, 8.4 Hz, 1H), 8.95 (d, *J* = 9.6 Hz, 1H), 9.40 (d, *J* = 1.2 Hz, 1H), 12.53 (s, 1H); <sup>13</sup>C NMR (100 MHz, DMSO-*d*<sub>6</sub>) δ 30.2, 58.8, 110.5, 116.1, 116.8, 123.9, 124.2, 125.7, 125.8, 126.8, 132.4, 133.8, 135.9, 136.3, 144.4; HRMS (*m/z*, ESI) calc. for C<sub>18</sub>H<sub>18</sub>N<sub>4</sub>OCl (+) 341.1164, found 341.1152.

*13-(tert-Butylamino)-10-methyl-6-oxo-5,6-dihydropyrido[2',1':2,3]imidazo[1,5-c]quinazolin-12-ium perchlorate (1c)*: 160 mg (38%) as a brown solid; mp 258.9–260.4 °C; <sup>1</sup>H NMR (400 MHz, DMSO-*d*<sub>6</sub>) δ 1.25 (s, 9H), 2.59 (s, 3H), 5.54 (s, 1H), 7.34–7.41 (m, 2H), 7.59–7.63 (m, 1H), 8.15 (d, *J* = 9.2 Hz, 1H), 8.68 (d, *J* = 8.0 Hz, 1H), 8.84 (d, *J* = 9.2 Hz, 1H), 8.95 (s, 1H), 12.26 (s, 1H); <sup>13</sup>C NMR (100 MHz, DMSO-*d*<sub>6</sub>) δ 18.2, 30.4, 58.3, 110.7, 114.5, 116.4, 123.5, 123.8, 125.0, 125.1, 125.8, 130.5, 132.2, 133.8, 135.5, 138.7, 144.7; HRMS (*m/z*, ESI) calc. for C<sub>19</sub>H<sub>21</sub>N<sub>4</sub>O (+) 321.1710, found 321.1700.

*10-Bromo-13-(tert-butylamino)-6-oxo-5,6-dihydropyrido[2',1':2,3]imidazo[1,5-c]quinazolin-12-ium perchlorate (1d)*: 267 mg (55%) as a slight yellow solid; mp 267.8–269.1 °C; <sup>1</sup>H NMR (300 MHz, DMSO-*d*<sub>6</sub>) δ 1.24 (s, 9H), 5.56 (s, 1H), 7.36–7.45 (m, 2H), 7.62–7.67 (m, 1H), 8.43 (dd, *J* = 1.8, 9.6 Hz, 1H), 8.69 (d, *J* = 7.2 Hz, 1H), 8.87 (d, *J* = 9.6 Hz, 1H), 9.38 (s,

1H), 12.45 (s, 1H); <sup>13</sup>C NMR (100 MHz, DMSO-*d*<sub>6</sub>) δ 30.2, 58.7, 110.4, 114.2, 116.2, 116.6, 123.9, 124.1, 125.5, 125.9, 127.3, 132.6, 134.1, 135.4, 138.8, 144.4; HRMS (*m/z*, ESI) calc. for C<sub>18</sub>H<sub>18</sub>N<sub>4</sub>OBr (+) 385.0659, found 385.0653.

13-(*tert*-Butylamino)-2-methoxy-10-methyl-6-oxo-5,6-dihydropyrido[2',1':2,3]imidazo[1,5-*c*]quin-azolin-12-ium perchlorate (**1e**): 225 mg (50%) as a grey solid; mp 270.8–272.7 °C; <sup>1</sup>H NMR (300 MHz, DMSO-*d*<sub>6</sub>) δ 1.27 (s, 9H), 2.59 (s, 3H), 3.87 (s, 3H), 5.64 (s, 1H), 7.26-7.28 (m, 2H), 8.13-8.17 (m, 2H), 8.84 (d, *J* = 9.3 Hz, 1H), 8.95 (s, 1H), 12.17 (s, 1H); <sup>13</sup>C NMR (100 MHz, DMSO-*d*<sub>6</sub>) δ 18.2, 30.5, 56.2, 58.1, 108.8, 111.4, 114.5, 117.8, 120.0, 123.5, 124.9, 125.1, 129.2, 130.5, 133.9, 138.6, 144.4, 155.4; HRMS (*m/z*, ESI) calc. for C<sub>20</sub>H<sub>23</sub>N<sub>4</sub>O<sub>2</sub> (+) 351.1816, found 351.1801.

13-(*tert*-Butylamino)-10-chloro-2-methoxy-6-oxo-5,6-dihydropyrido[2',1':2,3]imidazo[1,5-*c*]quinazolin-12-ium perchlorate (**1f**): 184 mg (39%) as a yellow solid; mp 238.4–240.5 °C; <sup>1</sup>H NMR (400 MHz, DMSO-*d*<sub>6</sub>) δ 1.27 (s, 9H), 3.88 (s, 3H), 5.66 (s, 1H), 7.28-7.34 (m, 2H), 8.18 (d, *J* = 2.8 Hz, 1H), 8.34 (dd, *J* = 2.0, 9.6 Hz, 1H), 8.96 (d, *J* = 9.6 Hz, 1H), 9.33 (d, *J* = 1.6 Hz, 1H) 12.20 (*br*, 1H); <sup>13</sup>C NMR (100 MHz, DMSO-*d*<sub>6</sub>) δ 30.3, 56.2, 58.5, 108.6, 111.0, 116.2, 118.1, 120.5, 124.1, 125.2, 125.7, 127.0, 129.5, 133.9, 136.4, 144.2, 155.5; HRMS (*m/z*, ESI) calc. for C<sub>19</sub>H<sub>20</sub>N<sub>4</sub>O<sub>2</sub>Cl (+) 371.1269, found 371.1277.

10-Bromo-13-(*tert*-butylamino)-2-methoxy-6-oxo-5,6-dihydropyrido[2',1':2,3]imidazo[1,5-*c*]quinazolin-12-ium perchlorate (**1g**): 247 mg (48%) as a brown solid; mp 249.5–251.3 °C; <sup>1</sup>H NMR (300 MHz, DMSO-*d*<sub>6</sub>) δ 1.26 (s, 9H), 3.88 (s, 3H), 5.65 (s, 1H), 7.28-7.32 (m, 2H), 8.17 (d, *J* = 2.1 Hz, 1H), 8.42 (dd, *J* = 1.5, 9.6 Hz, 1H), 8.87 (d, *J* = 9.6 Hz, 1H), 9.37 (s, 1H) 12.35 (s, 1H); <sup>13</sup>C NMR (125 MHz, DMSO-*d*<sub>6</sub>) δ 30.4, 56.3, 58.5, 108.7, 111.1, 114.2, 116.3, 118.1, 120.5, 123.9, 125.5, 127.2, 129.4, 134.2, 138.8, 144.2, 155.6; HRMS (*m/z*, ESI) calc. for C<sub>19</sub>H<sub>20</sub>N<sub>4</sub>O<sub>2</sub>Br (+) 415.0764, found 415.0764.

*13-(tert-Butylamino)-2-chloro-6-oxo-5,6-dihydropyrido[2',1':2,3]imidazo[1,5-c]quinazolin-12-ium perchlorate (Ih)*: 163 mg (37%) as a slight yellow solid; mp 285.7–287.4 °C; <sup>1</sup>H NMR (300 MHz, DMSO-*d*<sub>6</sub>) δ 1.25 (s, 9H), 5.77 (s, 1H), 7.35 (d, *J* = 9.0 Hz, 1H), 7.67 (dd, *J* = 2.4, 8.7 Hz, 1H), 7.89 (t, *J* = 6.9 Hz, 1H), 8.32 (t, *J* = 7.8 Hz, 1H), 8.71 (d, *J* = 2.1 Hz, 1H), 8.95 (d, *J* = 9.0 Hz, 1H), 9.17 (d, *J* = 6.6 Hz, 1H); <sup>13</sup>C NMR (75 MHz, DMSO-*d*<sub>6</sub>) δ 30.1, 58.1, 111.9, 114.8, 118.3, 120.0, 123.6, 124.0, 124.5, 127.2, 131.7, 132.3, 134.4, 134.8, 136.5, 144.4; HRMS (*m/z*, ESI) calc. for C<sub>18</sub>H<sub>18</sub>N<sub>4</sub>OCl (+) 341.1164, found 341.1156.

*10-Bromo-13-(tert-butylamino)-2-chloro-6-oxo-5,6-dihydropyrido[2',1':2,3]imidazo[1,5-c]quinazolin-12-ium perchlorate (Ii)*: 213 mg (41%) as a grey solid; mp 265.6–267.3 °C; <sup>1</sup>H NMR (400 MHz, DMSO-*d*<sub>6</sub>) δ 1.25 (s, 9H), 5.68 (s, 1H), 7.38 (d, *J* = 8.4 Hz, 1H), 7.71 (d, *J* = 8.4 Hz, 1H), 8.47 (d, *J* = 9.6 Hz, 1H), 8.70 (s, 1H), 8.87 (d, *J* = 9.2 Hz, 1H), 9.40 (s, 1H), 12.57 (s, 1H); <sup>13</sup>C NMR (100 MHz, DMSO-*d*<sub>6</sub>) δ 30.2, 58.9, 111.9, 114.6, 116.2, 118.5, 124.4, 124.5, 124.8, 127.5, 127.9, 132.4, 134.2, 134.5, 139.5, 144.2; HRMS (*m/z*, ESI) calc. for C<sub>18</sub>H<sub>17</sub>N<sub>4</sub>OClBr (+) 419.0269, found 419.0251.

*2-Bromo-13-(tert-butylamino)-6-oxo-5,6-dihydropyrido[2',1':2,3]imidazo[1,5-c]quinazolin-12-ium perchlorate (Ij)*: 189 mg (39%) as a slight yellow solid; mp 284.8–286.5 °C; <sup>1</sup>H NMR (400 MHz, DMSO-*d*<sub>6</sub>) δ 1.25 (s, 9H), 5.76 (s, 1H), 7.31 (s, 1H), 7.81–7.92 (m, 2H), 8.33 (s, 1H), 8.86–8.96 (m, 2H), 9.18 (s, 1H), 12.44 (s, 1H); <sup>13</sup>C NMR (100 MHz, DMSO-*d*<sub>6</sub>) δ 30.4, 58.4, 115.2, 115.5, 118.5, 120.4, 121.6, 123.8, 124.4, 127.7, 134.7, 135.2, 137.2, 137.7, 144.6; HRMS (*m/z*, ESI) calc. for C<sub>18</sub>H<sub>18</sub>N<sub>4</sub>OBr (+) 385.0659, found 385.0658.

*2,10-Dibromo-13-(tert-butylamino)-6-oxo-5,6-dihydropyrido[2',1':2,3]imidazo[1,5-c]quinazolin-12-ium perchlorate (Ik)*: 197 mg (35%) as a slight yellow solid; mp 259.7–261.6 °C; <sup>1</sup>H NMR (400 MHz, DMSO-*d*<sub>6</sub>) δ 1.25 (s, 9H), 5.68 (s, 1H), 7.31 (d, *J* = 8.8 Hz, 1H), 7.82 (d, *J* = 7.2 Hz, 1H), 8.47 (d, *J* = 9.2 Hz, 1H), 8.84–8.89 (m, 2H), 9.39 (s, 1H), 12.56 (s, 1H); <sup>13</sup>C NMR (100 MHz, DMSO-*d*<sub>6</sub>) δ 30.2, 58.9, 112.3, 114.5, 115.6, 116.2, 118.7, 124.2, 124.5, 127.4, 127.8, 134.2, 134.7, 135.1, 139.5, 144.2; HRMS (*m/z*, ESI) calc. for C<sub>18</sub>H<sub>17</sub>N<sub>4</sub>OBr<sub>2</sub> (+)

462.9764, found 462.9748.

*13-(tert-Butylamino)-10-chloro-2,4-dimethyl-6-oxo-5,6-dihydropyrido[2',1':2,3]imidazo[1,5-c]quinazolin-12-ium perchlorate (II)*: 188 mg (40%) as a brown solid; mp 242.3–244.2 °C; <sup>1</sup>H NMR (300 MHz, DMSO-*d*<sub>6</sub>) δ 1.24 (*s*, 9H), 2.38 (*s*, 3H), 2.43 (*s*, 3H), 5.54 (*s*, 1H), 7.34 (*s*, 1H), 8.33 (*d*, *J* = 9.9 Hz, 1H), 8.43 (*s*, 1H), 8.95 (*d*, *J* = 9.3 Hz, 1H), 9.32 (*s*, 1H) 11.50 (*s*, 1H); <sup>13</sup>C NMR (100 MHz, DMSO-*d*<sub>6</sub>) δ 18.0, 20.8, 30.3, 58.7, 110.5, 116.3, 123.4, 123.8, 125.2, 125.4, 125.8, 127.1, 131.8, 132.9, 133.7, 134.9, 136.3, 144.7; HRMS (*m/z*, ESI) calc. for C<sub>20</sub>H<sub>22</sub>N<sub>4</sub>OCl (+) 369.1477, found 369.1477.

*13-(tert-Butylamino)-10-chloro-4-fluoro-6-oxo-5,6-dihydropyrido[2',1':2,3]imidazo[1,5-c]quinazolin-12-ium perchlorate (Im)*: 174 mg (38%) as a yellow solid; mp 236.5–238.4 °C; <sup>1</sup>H NMR (300 MHz, DMSO-*d*<sub>6</sub>) δ 1.24 (*s*, 9H), 5.60 (*s*, 1H), 7.43-7.45 (*m*, 1H), 7.56-7.62 (*m*, 1H), 8.39 (*dd*, *J* = 1.8, 9.3 Hz, 1H), 8.50 (*d*, *J* = 7.8 Hz, 1H), 8.96 (*d*, *J* = 9.6 Hz, 1H), 9.36 (*d*, *J* = 1.5 Hz, 1H), 12.57 (*s*, 1H); <sup>13</sup>C NMR (100 MHz, DMSO-*d*<sub>6</sub>) δ 30.2, 58.8, 112.6, 116.2, 118.1, 118.2, 121.6, 124.3, 124.5, 124.6, 125.1, 125.5, 127.3, 134.1, 137.1, 144.3; HRMS (*m/z*, ESI) calc. for C<sub>18</sub>H<sub>17</sub>N<sub>4</sub>OClF (+) 359.1069, found 359.1069.

*13-(Cyclohexylamino)-10-methyl-6-oxo-5,6-dihydropyrido[2',1':2,3]imidazo[1,5-c]quinazolin-12-ium perchlorate (In)*: 232 mg (52%) as a grey solid; mp 244.9–246.6 °C; <sup>1</sup>H NMR (400 MHz, DMSO-*d*<sub>6</sub>) δ 1.13-1.22 (*m*, 3H), 1.38-1.43 (*m*, 2H), 1.56-1.59 (*m*, 1H), 1.65-1.72 (*m*, 2H), 1.92-1.94 (*m*, 2H), 2.60 (*s*, 3H), 3.04-3.07 (*m*, 1H), 5.70 (*d*, *J* = 6.0 Hz, 1H), 7.35 (*d*, *J* = 8.0 Hz, 1H), 7.44 (*t*, *J* = 7.6 Hz, 1H), 7.62 (*t*, *J* = 8.0 Hz, 1H), 8.14 (*d*, *J* = 9.2 Hz, 1H), 8.44 (*d*, *J* = 8.0 Hz, 1H), 8.82 (*d*, *J* = 9.2 Hz, 1H), 8.88 (*s*, 1H), 12.25 (*s*, 1H); <sup>13</sup>C NMR (100 MHz, DMSO-*d*<sub>6</sub>) δ 18.3, 25.1, 25.6, 33.6, 57.1, 110.8, 114.5, 116.5, 122.7, 124.5, 124.7, 124.9, 131.0, 131.9, 133.3, 135.2, 138.5, 144.6; HRMS (*m/z*, ESI) calc. for C<sub>21</sub>H<sub>23</sub>N<sub>4</sub>O (+) 347.1866, found 347.1852.

*10-Chloro-13-(cyclohexylamino)-6-oxo-5,6-dihydropyrido[2',1':2,3]imidazo[1,5-c]quinazolin-12-ium perchlorate (Io)*: 224 mg (48%) as a brown solid; mp 258.7–260.4 °C; <sup>1</sup>H NMR (400 MHz, DMSO-*d*<sub>6</sub>) δ 1.13-1.17 (*m*, 3H), 1.36-1.41 (*m*, 2H), 1.56-1.59 (*m*, 1H), 1.65-1.72 (*m*, 2H), 1.92-1.96 (*m*, 2H), 3.06 (*m*, 1H), 5.74 (*d*, *J* = 4.4 Hz, 1H), 7.38 (*d*, *J* = 8.0 Hz, 1H), 7.48 (*t*, *J* = 7.6 Hz, 1H), 7.64 (*d*, *J* = 7.6 Hz, 1H), 8.35 (*dd*, *J* = 1.6, 9.6 Hz, 1H), 8.43 (*d*, *J* = 8.0 Hz, 1H), 8.92 (*d*, *J* = 9.6 Hz, 1H), 9.32 (*s*, 1H), 12.44 (*s*, 1H); <sup>13</sup>C NMR (125 MHz, DMSO-*d*<sub>6</sub>) δ 25.2, 25.7, 33.6, 57.4, 110.5, 116.1, 116.7, 123.4, 124.8, 124.9, 125.1, 125.5, 127.5, 132.4, 133.3, 135.3, 136.4, 144.4; HRMS (*m/z*, ESI) calc. for C<sub>20</sub>H<sub>20</sub>N<sub>4</sub>OCl (+) 367.1320, found 367.1313.

*10-Bromo-13-(cyclohexylamino)-6-oxo-5,6-dihydropyrido[2',1':2,3]imidazo[1,5-c]quinazolin-12-ium perchlorate (Ip)*: 230 mg (45%) as a brown solid; mp 286.6–288.7 °C; <sup>1</sup>H NMR (300 MHz, DMSO-*d*<sub>6</sub>) δ 1.12-1.21 (*m*, 3H), 1.38-1.44 (*m*, 2H), 1.56-1.57 (*m*, 1H), 1.65-1.73 (*m*, 2H), 1.92-1.95 (*m*, 2H), 3.03-3.04 (*m*, 1H), 5.73 (*d*, *J* = 6.9 Hz, 1H), 7.38 (*d*, *J* = 8.1 Hz, 1H), 7.45-7.50 (*m*, 1H), 7.63-7.68 (*m*, 1H), 8.41-8.45 (*m*, 2H), 8.84 (*d*, *J* = 9.6 Hz, 1H), 9.36 (*s*, 1H), 12.43 (*s*, 1H); <sup>13</sup>C NMR (125 MHz, DMSO-*d*<sub>6</sub>) δ 25.2, 25.7, 33.6, 57.5, 110.5, 114.7, 116.2, 116.7, 123.1, 124.8, 125.1, 125.4, 126.7, 132.4, 133.6, 135.3, 138.7, 144.4; HRMS (*m/z*, ESI) calc. for C<sub>20</sub>H<sub>20</sub>N<sub>4</sub>OBr (+) 411.0815, found 411.0800.

*10-Chloro-13-(cyclohexylamino)-2-methoxy-6-oxo-5,6-dihydropyrido[2',1':2,3]imidazo[1,5-c]quinazolin-12-ium perchlorate (Iq)*: 234 mg (47%) as a brown solid; mp 269.5–271.2 °C; <sup>1</sup>H NMR (300 MHz, DMSO-*d*<sub>6</sub>) δ 1.13-1.22 (*m*, 3H), 1.38-1.43 (*m*, 2H), 1.56-1.59 (*m*, 1H), 1.65-1.72 (*m*, 2H), 1.92-1.95 (*m*, 2H), 3.07-3.10 (*m*, 1H), 3.88 (*s*, 3H), 5.81 (*d*, *J* = 6.6 Hz, 1H), 7.28-7.36 (*m*, 2H), 7.90 (*d*, *J* = 2.1 Hz, 1H), 8.33 (*dd*, *J* = 1.5, 9.3 Hz, 1H), 8.92 (*d*, *J* = 9.6 Hz, 1H), 9.33 (*s*, 1H), 12.34 (*br*, 1H); <sup>13</sup>C NMR (75 MHz, DMSO-*d*<sub>6</sub>) δ 25.1, 25.6, 33.7, 56.1, 57.5, 107.6, 111.0, 116.1, 118.1, 120.3, 123.0, 124.7, 125.5, 127.3, 129.0, 133.2, 136.1, 144.1, 156.0; HRMS (*m/z*, ESI) calc. for C<sub>21</sub>H<sub>22</sub>N<sub>4</sub>O<sub>2</sub>Cl (+) 397.1426, found 397.1419.

*10-Bromo-13-(cyclohexylamino)-2-methoxy-6-oxo-5,6-dihydropyrido[2',1':2,3]imidazo[1,5-c]quinazolin-12-ium perchlorate (Ir)*: 206 mg (38%) as a green solid; mp 275.2–277.3 °C; <sup>1</sup>H NMR (500 MHz, DMSO-*d*<sub>6</sub>) δ 1.15-1.22 (*m*, 3H), 1.40-1.44 (*m*, 2H), 1.57-1.60 (*m*, 1H), 1.69-1.72 (*m*, 2H), 1.92-1.96 (*m*, 2H), 3.08-3.10 (*m*, 1H), 3.88 (*s*, 3H), 5.78 (*d*, *J* = 6.2 Hz, 1H), 7.28-7.35 (*m*, 2H), 7.90 (*s*, 1H), 8.41 (*d*, *J* = 9.5 Hz, 1H), 8.85 (*d*, *J* = 9.5 Hz, 1H), 9.36 (*s*, 1H), 12.31 (*s*, 1H); <sup>13</sup>C NMR (125 MHz, DMSO-*d*<sub>6</sub>) δ 25.1, 25.7, 33.8, 56.2, 57.7, 107.8, 111.1, 114.6, 116.2, 118.2, 120.3, 123.0, 125.4, 126.6, 129.1, 133.6, 138.5, 144.1, 156.2; HRMS (*m/z*, ESI) calc. for C<sub>21</sub>H<sub>22</sub>N<sub>4</sub>O<sub>2</sub>Br (+) 441.0921, found 441.0900.

*2,10-Dichloro-13-(cyclohexylamino)-6-oxo-5,6-dihydropyrido[2',1':2,3]imidazo[1,5-c]quinazolin-12-ium perchlorate (Is)*: 256 mg (51%) as a slight purple solid; mp 249.1–250.8 °C; <sup>1</sup>H NMR (500 MHz, DMSO-*d*<sub>6</sub>) δ 1.16-1.22 (*m*, 3H), 1.38-1.42 (*m*, 2H), 1.56-1.59 (*m*, 1H), 1.65-1.72 (*m*, 2H), 1.92-1.94 (*m*, 2H), 3.03-3.06 (*m*, 1H), 5.88 (*d*, *J* = 6.8 Hz, 1H), 7.39 (*d*, *J* = 8.8 Hz, 1H), 7.71-7.73 (*m*, 1H), 8.38-8.44 (*m*, 2H), 8.92 (*d*, *J* = 9.6 Hz, 1H), 9.31 (*s*, 1H), 12.55 (*s*, 1H); <sup>13</sup>C NMR (125 MHz, DMSO-*d*<sub>6</sub>) δ 25.1, 25.7, 33.8, 57.6, 112.0, 116.1, 118.7, 122.2, 124.2, 125.1, 126.1, 127.7, 128.6, 132.2, 133.5, 134.3, 137.0, 144.2; HRMS (*m/z*, ESI) calc. for C<sub>20</sub>H<sub>19</sub>N<sub>4</sub>OCl<sub>2</sub> (+) 401.0930, found 401.0917.

*10-Bromo-2-chloro-13-(cyclohexylamino)-6-oxo-5,6-dihydropyrido[2',1':2,3]imidazo[1,5-c]quinazolin-12-ium perchlorate (It)*: 218 mg (40%) as a slight purple solid; mp 278.8–280.8 °C; <sup>1</sup>H NMR (400 MHz, DMSO-*d*<sub>6</sub>) δ 1.12-1.22 (*m*, 3H), 1.35-1.43 (*m*, 2H), 1.56-1.59 (*m*, 1H), 1.65-1.72 (*m*, 2H), 1.92-1.99 (*m*, 2H), 3.02-3.06 (*m*, 1H), 5.88 (*d*, *J* = 6.8 Hz, 1H), 7.38 (*d*, *J* = 8.8 Hz, 1H), 7.71 (*dd*, *J* = 2.4, 8.8 Hz, 1H), 8.42-8.48 (*m*, 2H), 8.84 (*d*, *J* = 9.6 Hz, 1H), 9.36 (*d*, *J* = 1.2 Hz, 1H), 12.56 (*s*, 1H); <sup>13</sup>C NMR (100 MHz, DMSO-*d*<sub>6</sub>) δ 25.1, 25.6, 33.7, 57.6, 112.0, 114.8, 116.1, 118.6, 121.7, 124.0, 125.9, 126.9, 128.5, 132.0, 133.6, 134.2, 139.2, 144.2; HRMS (*m/z*, ESI) calc. for C<sub>20</sub>H<sub>19</sub>N<sub>4</sub>OClBr (+) 445.0425, found 445.0419.



*2-Bromo-10-chloro-13-(cyclohexylamino)-6-oxo-5,6-dihydropyrido[2',1':2,3]imidazo[1,5-c]quinazolin-12-ium perchlorate (Iu)*: 186 mg (34%) as a slight yellow solid; mp 286.8–288.7 °C; <sup>1</sup>H NMR (300 MHz, DMSO-*d*<sub>6</sub>) δ 1.12-1.21 (*m*, 3H), 1.38-1.42 (*m*, 2H), 1.57-1.58 (*m*, 1H), 1.69-1.73 (*m*, 2H), 1.91-1.95 (*m*, 2H), 3.04 (*m*, 1H), 5.90 (*d*, *J* = 6.9 Hz, 1H), 7.31 (*d*, *J* = 8.7 Hz, 1H), 7.82 (*dd*, *J* = 2.1, 8.7 Hz, 1H), 8.37 (*dd*, *J* = 1.8, 9.6 Hz, 1H), 8.56 (*d*, *J* = 1.8 Hz, 1H), 8.91 (*d*, *J* = 9.6 Hz, 1H), 9.32 (*d*, *J* = 1.2 Hz, 1H), 12.57 (*s*, 1H); <sup>13</sup>C NMR (75 MHz, DMSO-*d*<sub>6</sub>) δ 25.1, 25.6, 33.7, 57.5, 112.4, 116.0, 116.2, 118.7, 121.8, 125.0, 126.1, 127.0, 127.6, 133.3, 134.5, 134.8, 136.8, 144.2; HRMS (*m/z*, ESI) calc. for C<sub>20</sub>H<sub>19</sub>N<sub>4</sub>OClBr (+) 445.0425, found 445.0430.

*2,10-Dibromo-13-(cyclohexylamino)-6-oxo-5,6-dihydropyrido[2',1':2,3]imidazo[1,5-c]quinazolin-12-ium perchlorate (Iv)*: 219 mg (37%) as a green solid; mp 278.2–280.3 °C; <sup>1</sup>H NMR (500 MHz, DMSO-*d*<sub>6</sub>) δ 1.14-1.21 (*m*, 3H), 1.38-1.41(*m*, 2H), 1.57-1.58 (*m*, 1H), 1.69-1.73 (*m*, 2H), 1.91-1.94 (*m*, 2H), 3.03-3.05 (*m*, 1H), 5.86 (*d*, *J* = 7.0 Hz, 1H), 7.32 (*d*, *J* = 8.8 Hz, 1H), 7.82 (*d*, *J* = 8.9 Hz, 1H), 8.45 (*d*, *J* = 9.5 Hz, 1H), 8.55 (*s*, 1H), 8.84 (*d*, *J* = 9.5 Hz, 1H), 9.35 (*s*, 1H), 12.53 (*s*, 1H); <sup>13</sup>C NMR (100 MHz, DMSO-*d*<sub>6</sub>) δ 25.1, 25.6, 33.7, 57.6, 112.4, 114.8, 116.1, 116.2, 118.8, 121.6, 125.9, 126.8, 127.0, 133.5, 134.7, 139.1, 144.2; HRMS (*m/z*, ESI) calc. for C<sub>20</sub>H<sub>19</sub>N<sub>4</sub>OBr<sub>2</sub> (+) 488.9920, found 488.9906.

*13-(Cyclohexylamino)-2-iodo-10-methyl-6-oxo-5,6-dihydropyrido[2',1':2,3]imidazo[1,5-c]quinazolin-12-ium perchlorate (Iw)*: 206 mg (36%) as a slight yellow solid; mp 285.7–287.8 °C; <sup>1</sup>H NMR (400 MHz, DMSO-*d*<sub>6</sub>) δ 1.15-1.22 (*m*, 3H), 1.40-1.49 (*m*, 2H), 1.58-1.60 (*m*, 1H), 1.71-1.78 (*m*, 2H), 1.92-1.95 (*m*, 2H), 2.60 (*s*, 3H), 3.01-3.04 (*m*, 1H), 5.83 (*d*, *J* = 6.4 Hz, 1H), 7.14 (*d*, *J* = 8.4 Hz, 1H), 7.91 (*d*, *J* = 8.8 Hz, 1H), 8.16 (*d*, *J* = 9.2 Hz, 1H), 8.75 (*s*, 1H), 8.81 (*d*, *J* = 9.2 Hz, 1H), 8.89 (*s*, 1H), 12.33 (*s*, 1H); <sup>13</sup>C NMR (100 MHz, DMSO-*d*<sub>6</sub>) δ 18.3, 25.1, 25.7, 33.8, 57.3, 87.7, 113.0, 114.5, 118.5, 121.1, 124.6, 125.3, 131.2, 132.9, 133.4, 134.8, 138.9, 139.9, 144.4; HRMS (*m/z*, ESI) calc. for C<sub>21</sub>H<sub>22</sub>N<sub>4</sub>OI (+) 473.0833, found 473.0811.

*10-Bromo-13-(cyclohexylamino)-4-fluoro-6-oxo-5,6-dihydropyrido[2',1':2,3]imido[1,5-c]quinazolin-12-ium perchlorate (Ix)*: 175 mg (33%) as a slight yellow solid; mp 254.6–256.7 °C; <sup>1</sup>H NMR (400 MHz, DMSO-*d*<sub>6</sub>) δ 1.14-1.22 (*m*, 3H), 1.38-1.444 (*m*, 2H), 1.58-1.60 (*m*, 1H), 1.67-1.76 (*m*, 2H), 1.91-1.94 (*m*, 2H), 3.03-3.05 (*m*, 1H), 5.77 (*d*, *J* = 6.4 Hz, 1H), 7.46-7.51 (*m*, 1H), 7.57-7.62 (*m*, 1H), 8.23 (*d*, *J* = 7.6 Hz, 1H), 8.46 (*d*, *J* = 9.2 Hz, 1H), 8.87 (*d*, *J* = 9.2 Hz, 1H), 9.39 (*s*, 1H), 12.53 (*s*, 1H); <sup>13</sup>C NMR (100 MHz, DMSO-*d*<sub>6</sub>) δ 25.1, 25.6, 33.5, 57.5, 112.7, 114.8, 116.2, 117.8, 118.0, 120.7, 123.8, 124.0, 125.2, 125.9, 126.9, 133.7, 139.2, 144.2; HRMS (*m/z*, ESI) calc. for C<sub>20</sub>H<sub>19</sub>N<sub>4</sub>OBrF (+) 429.0721, found 429.0725.

*10-Chloro-13-(cyclohexylamino)-2,4-dimethyl-6-oxo-5,6-dihydropyrido[2',1':2,3]imido[1,5-c]quinazolin-12-ium perchlorate (Iy)*: 188 mg (38%) as a yellow solid; mp 212.4–214.2 °C; <sup>1</sup>H NMR (300 MHz, DMSO-*d*<sub>6</sub>) δ 1.14-1.22 (*m*, 3H), 1.38-1.43 (*m*, 2H), 1.54-1.60 (*m*, 1H), 1.66-1.72 (*m*, 2H), 1.89-1.93 (*m*, 2H), 2.38 (*s*, 3H), 2.42 (*s*, 3H), 3.01-3.04 (*m*, 1H), 5.66 (*d*, *J* = 6.9 Hz, 1H), 7.31 (*s*, 1H), 8.10 (*s*, 1H), 8.24 (*dd*, *J* = 1.8, 9.3 Hz, 1H), 8.95 (*d*, *J* = 9.3 Hz, 1H), 9.26 (*s*, 1H); <sup>13</sup>C NMR (100 MHz, DMSO-*d*<sub>6</sub>) δ 18.1, 21.0, 25.1, 25.6, 33.7, 57.4, 110.4, 116.2, 122.4, 123.8, 124.2, 124.8, 126.4, 127.1, 132.6, 132.7, 134.3, 135.0, 144.9; HRMS (*m/z*, ESI) calc. for C<sub>22</sub>H<sub>24</sub>N<sub>4</sub>OCl (+) 395.1633, found 395.1632.

**Note:** Yields and NMR shifts of the compounds (**1a**, **1e**, **1f**, **1l**, **1m**, **1r**, **1u**, **1v** and **1w**) were already published in CN105017253 A.

# $^1\text{H}$ NMR and $^{13}\text{C}$ NMR spectra

**1a**

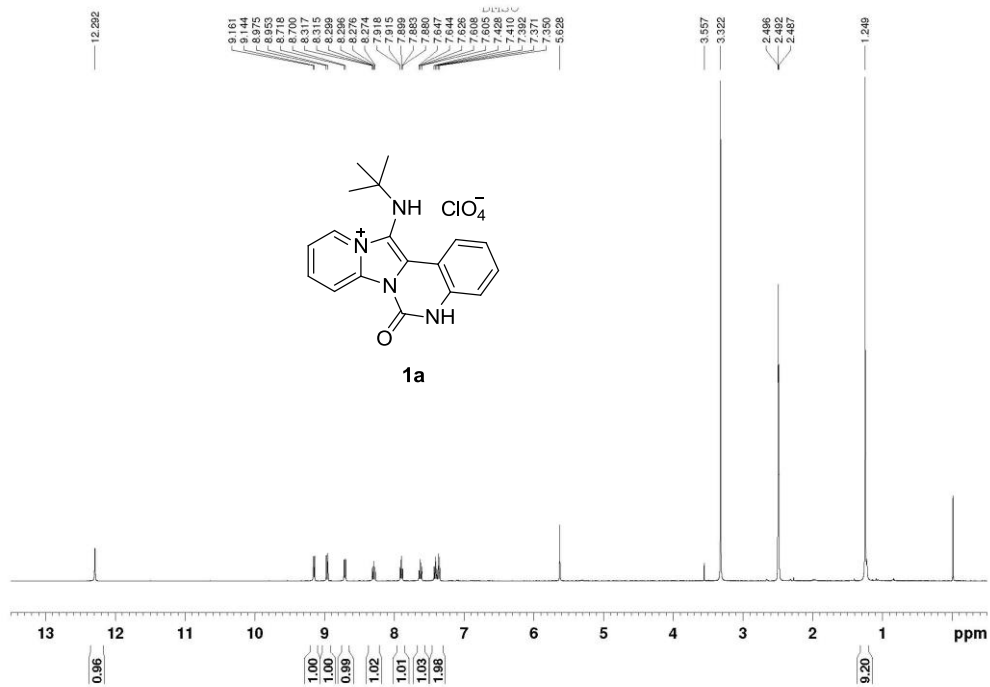



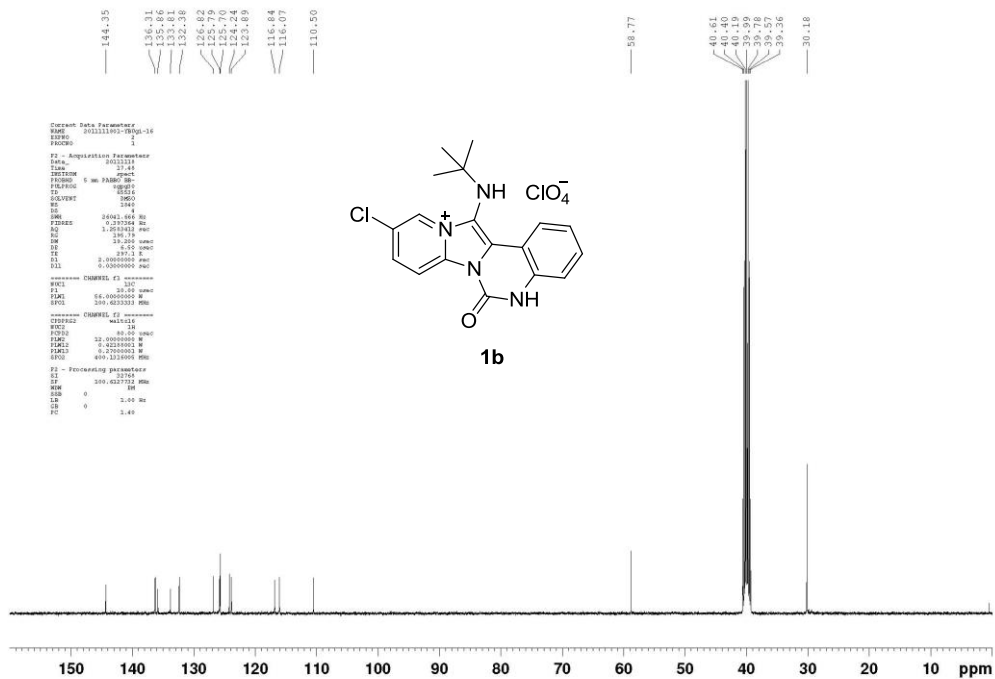

1c

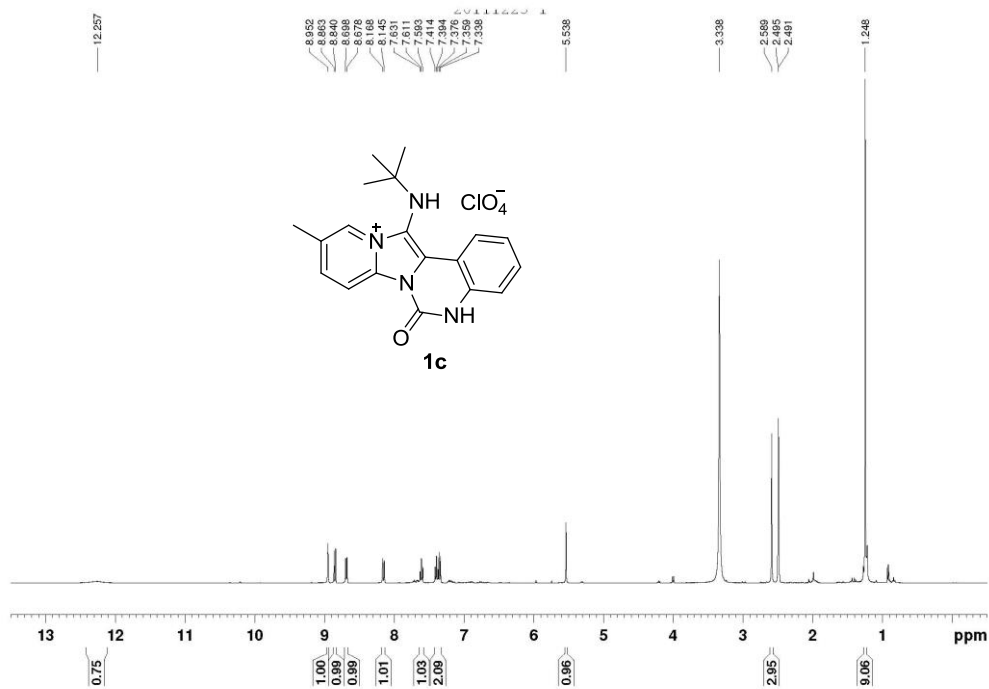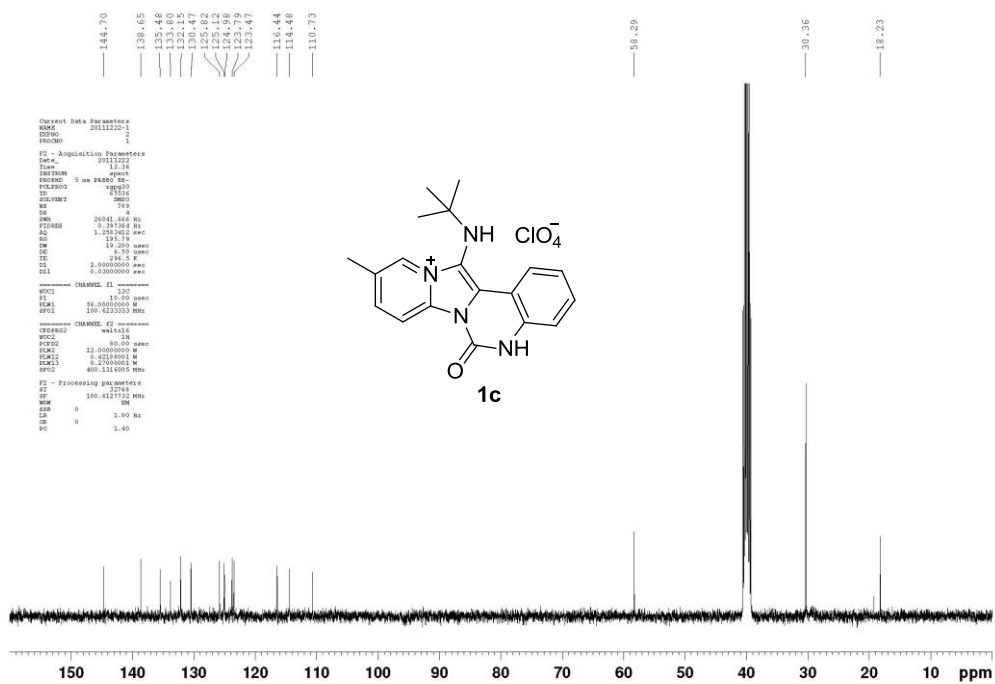

```

Current Data Parameters
NAME 2011122-1
EXPNO 2
PROCNO 1
F2 - Acquisition Parameters
Date_ 20111222
Time 15.36
INSTRUM spect
PROBHD 5 mm HXBO 1H-
PULPROG zgpg30
PCPRG2 4
AQ 4.516
RG 400
DS 2
SFO 250.132 MHz
FIDRES 0.397382 Hz
AQ 1.235812 sec
RG 256
AQ 19.200 sec
DE 0.500000 sec
SI 32768
SF 100.626130 MHz
DELTA 0.330000000 sec
===== CHANNEL f2 =====
NUC1 13C
P1 15.00000000 sec
RF1 100.626130000 MHz
===== CHANNEL f1 =====
INSTRUM spect
PROBHD 5 mm HXBO 1H-
PULPROG zgpg30
PCPRG2 4
AQ 4.516
RG 400
DS 2
SFO 250.132 MHz
FIDRES 0.397382 Hz
AQ 1.235812 sec
RG 256
AQ 19.200 sec
DE 0.500000 sec
SI 32768
SF 100.626130 MHz
DELTA 0.330000000 sec
===== Processing parameters =====
SI 32768
SF 100.626130 MHz
WDW EM
SSB 0
GB 0
PC 3.40
  
```

1d

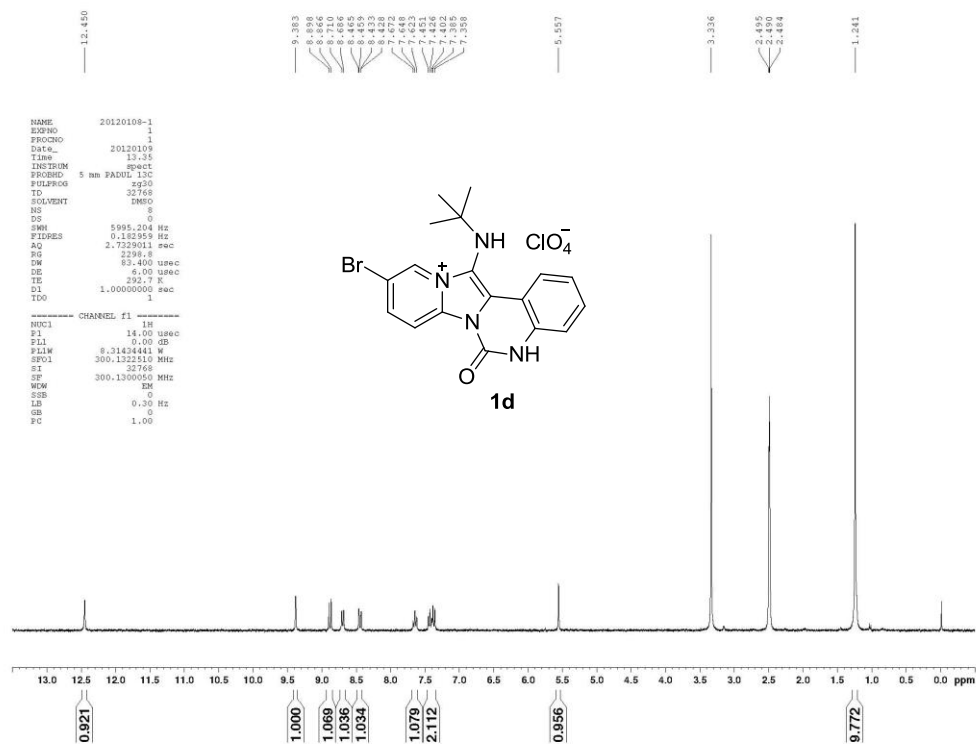

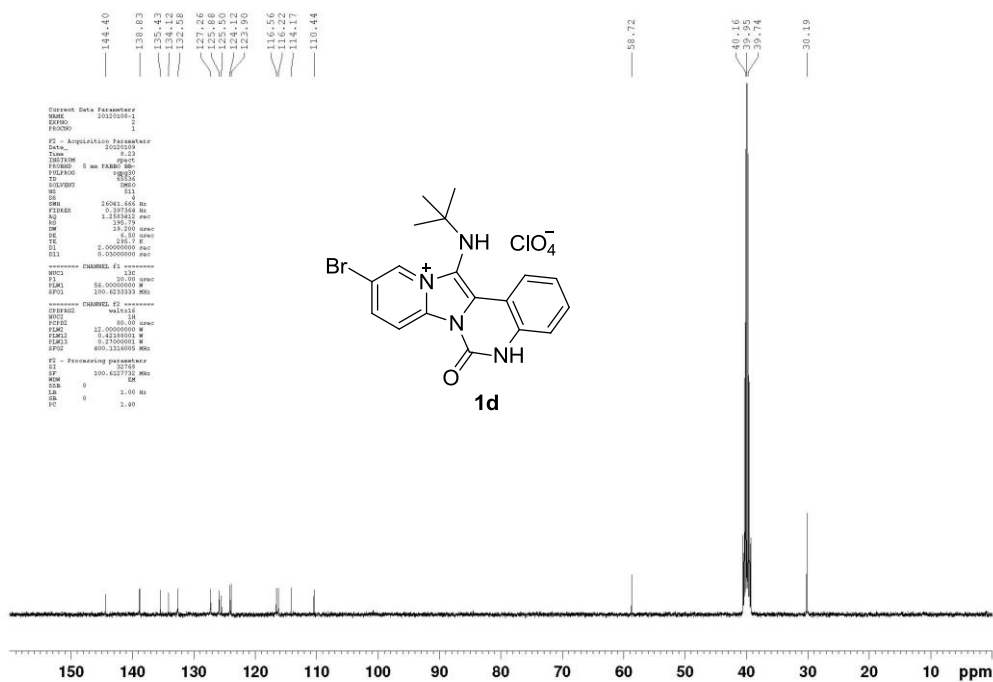

1e

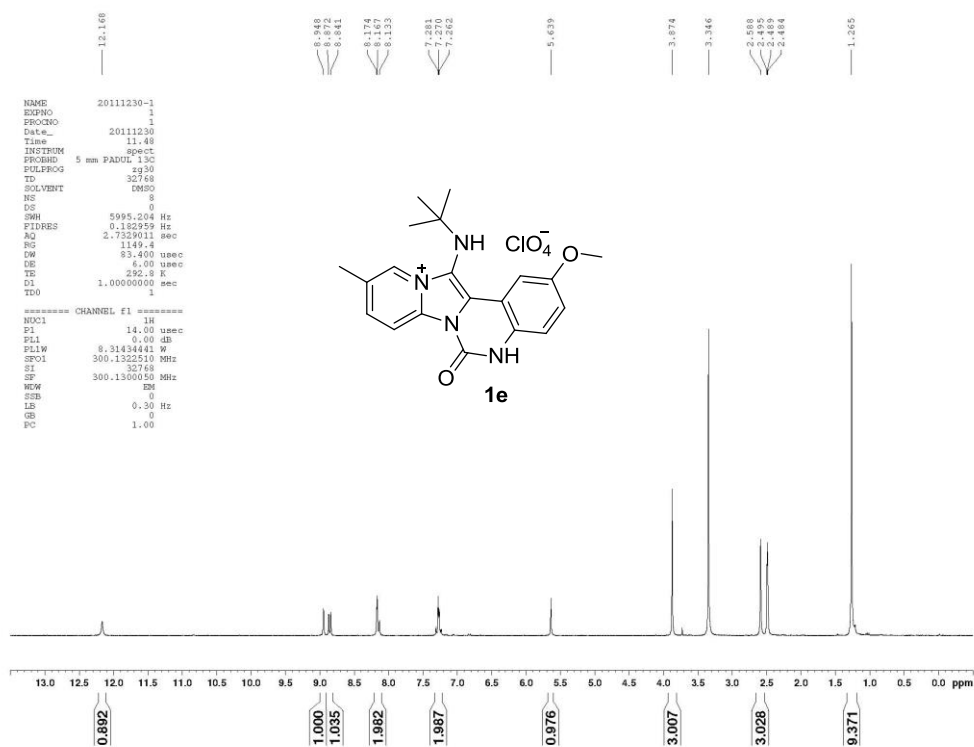



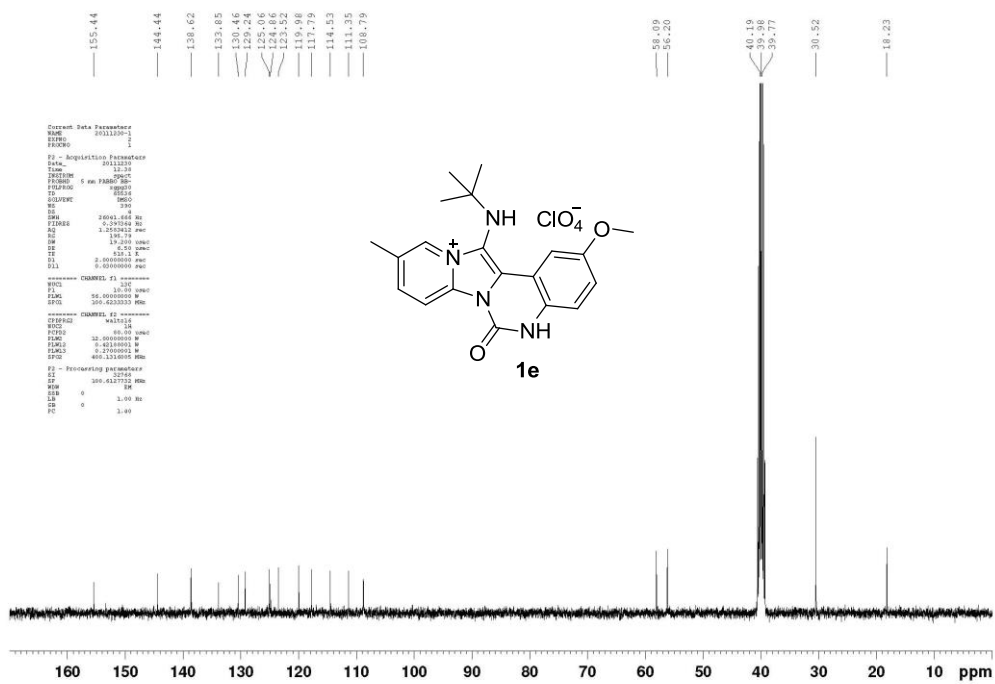

**1f**

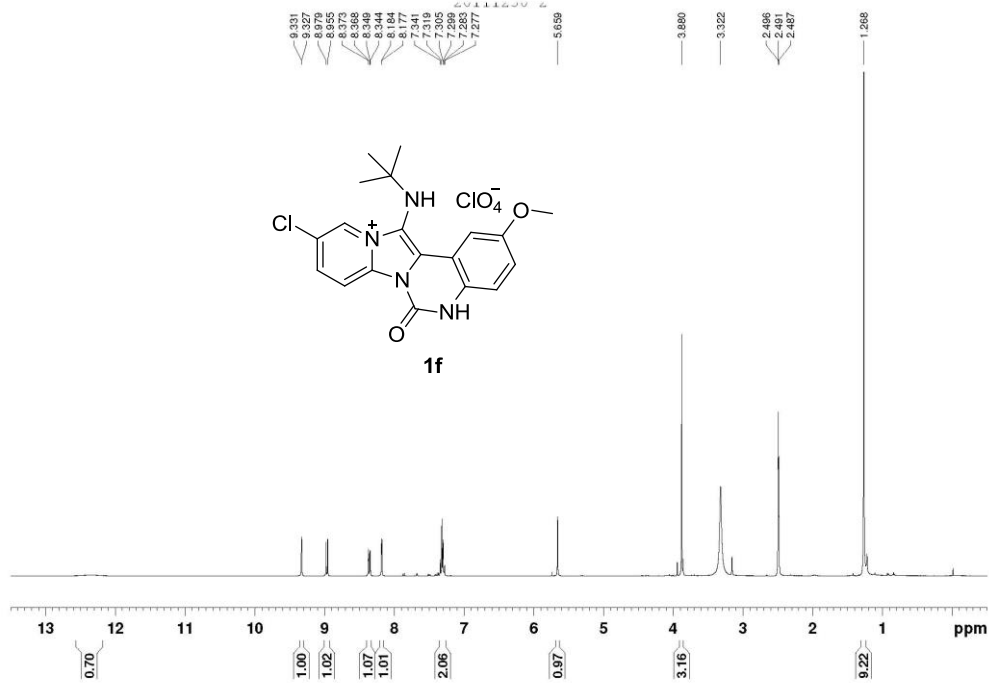



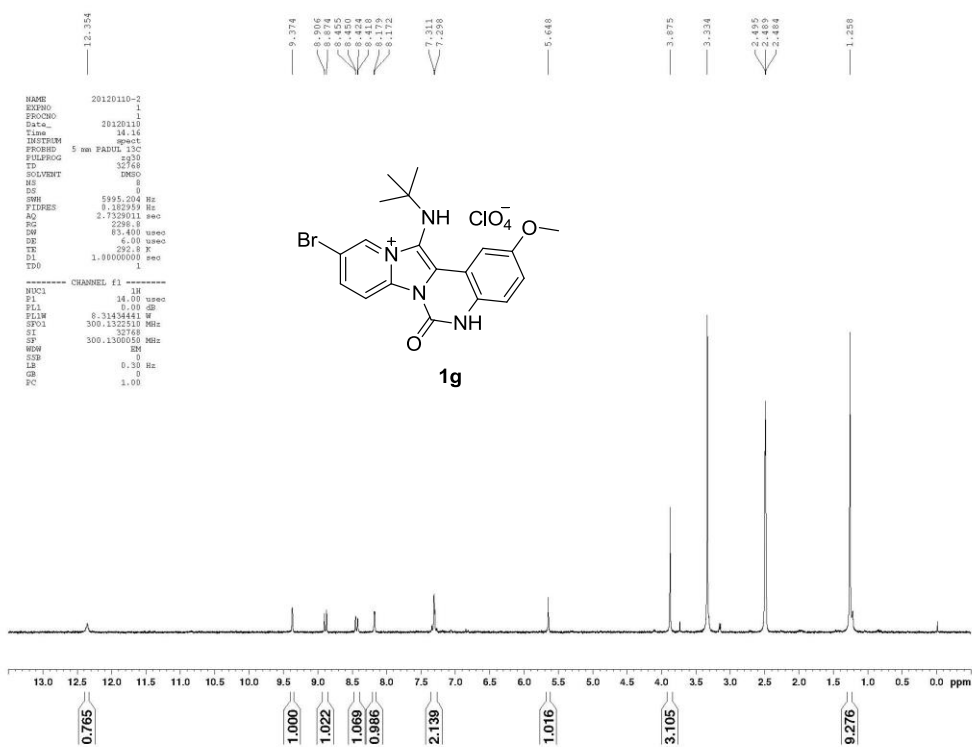

sample:20120110-2, solvent:DMSO  
 spectrum:Yangbo

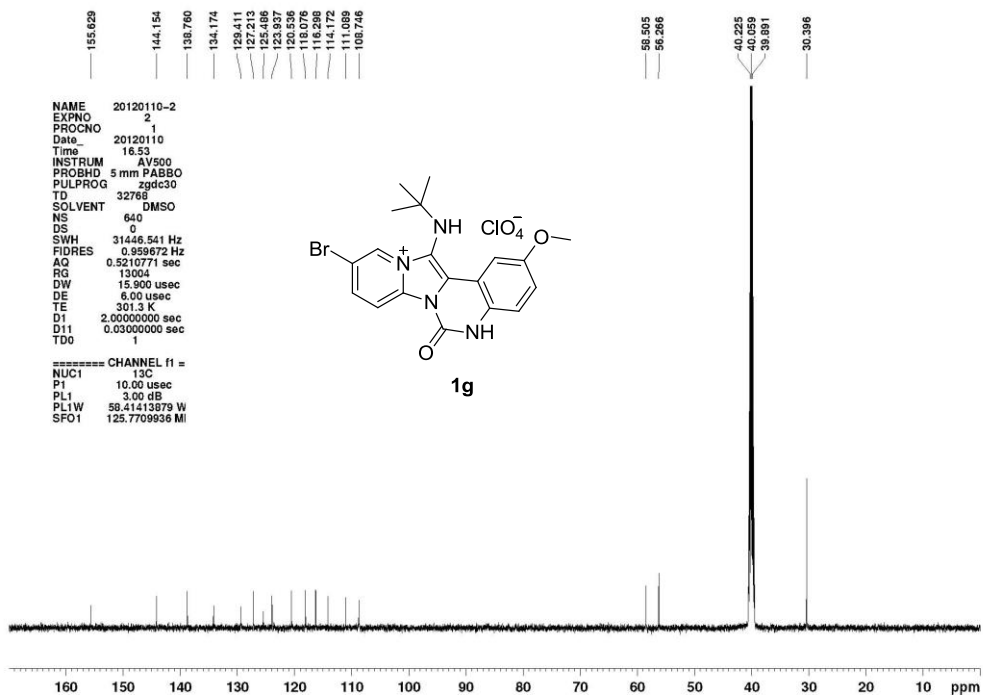

1h

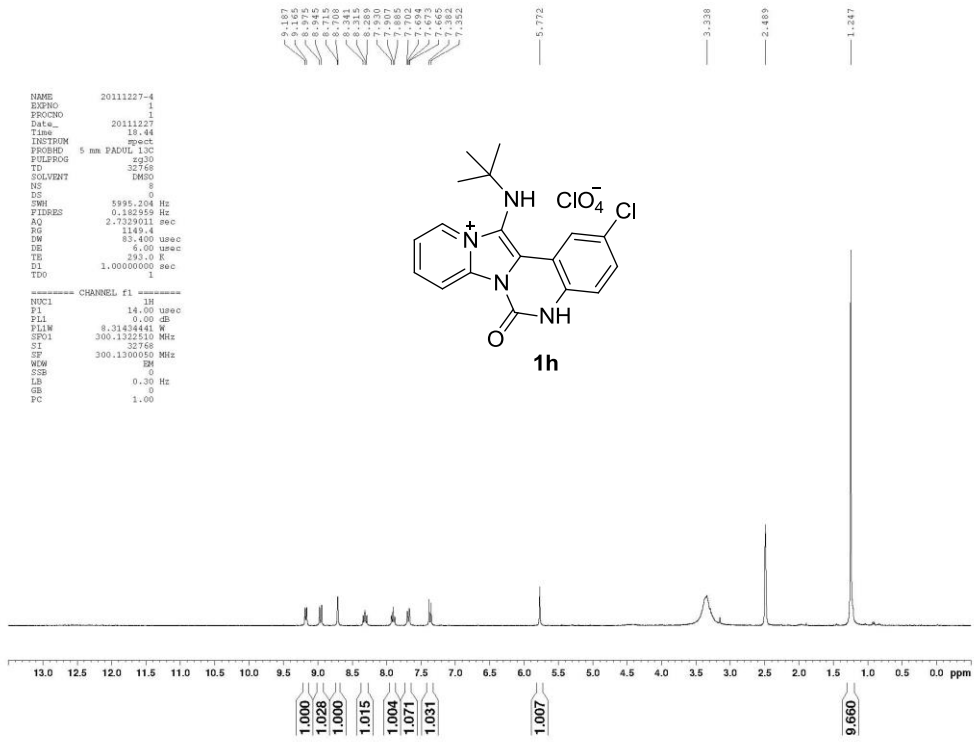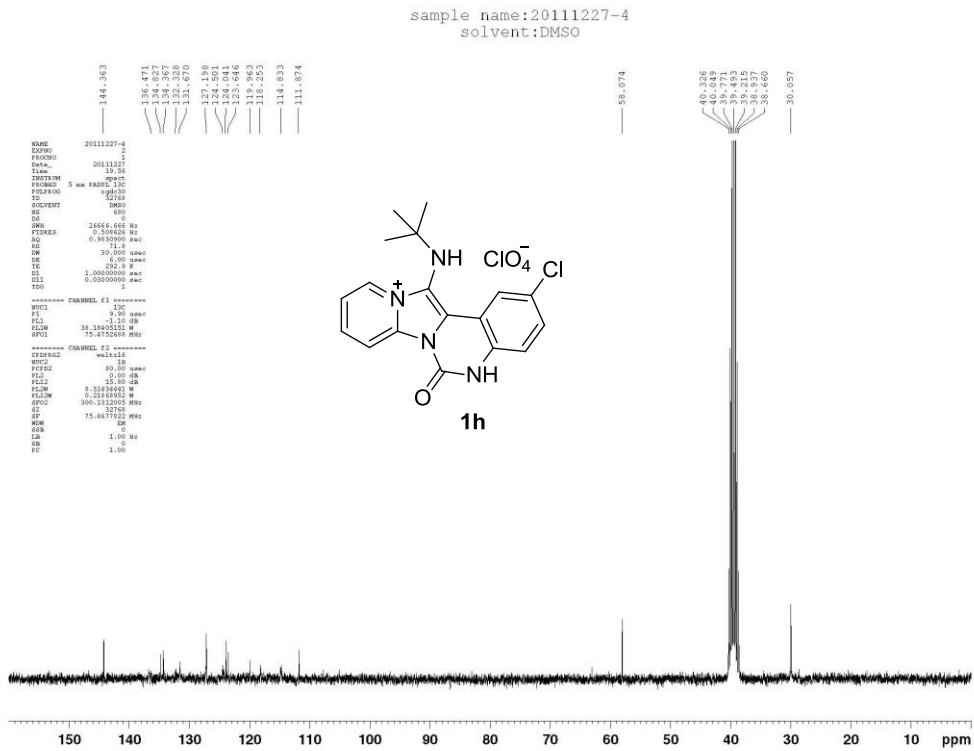

1i

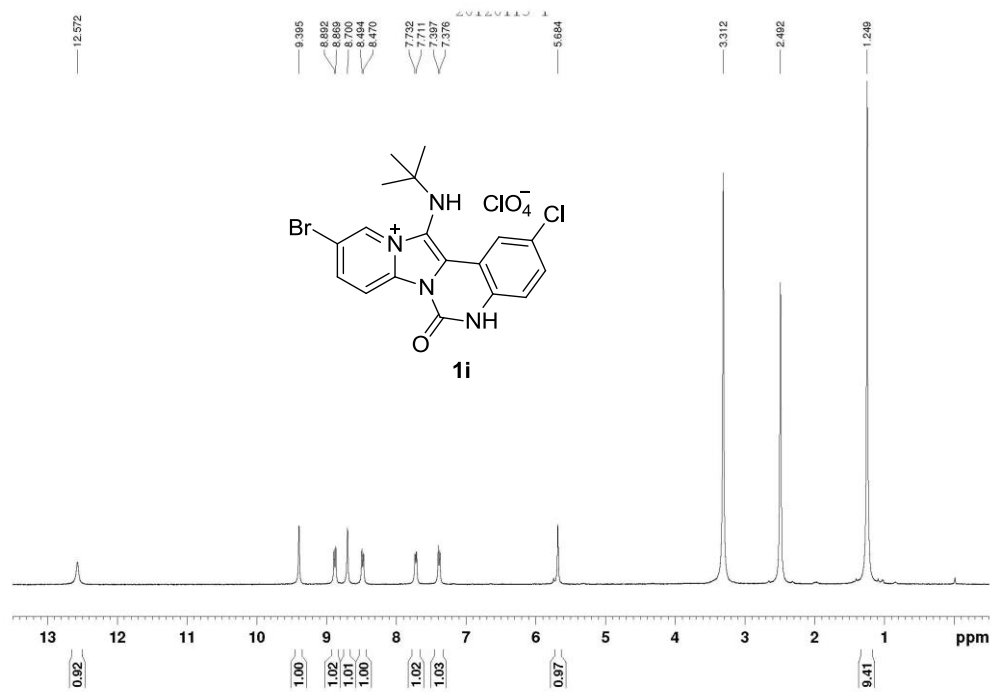



STY-160615-1  
DMSO 400M

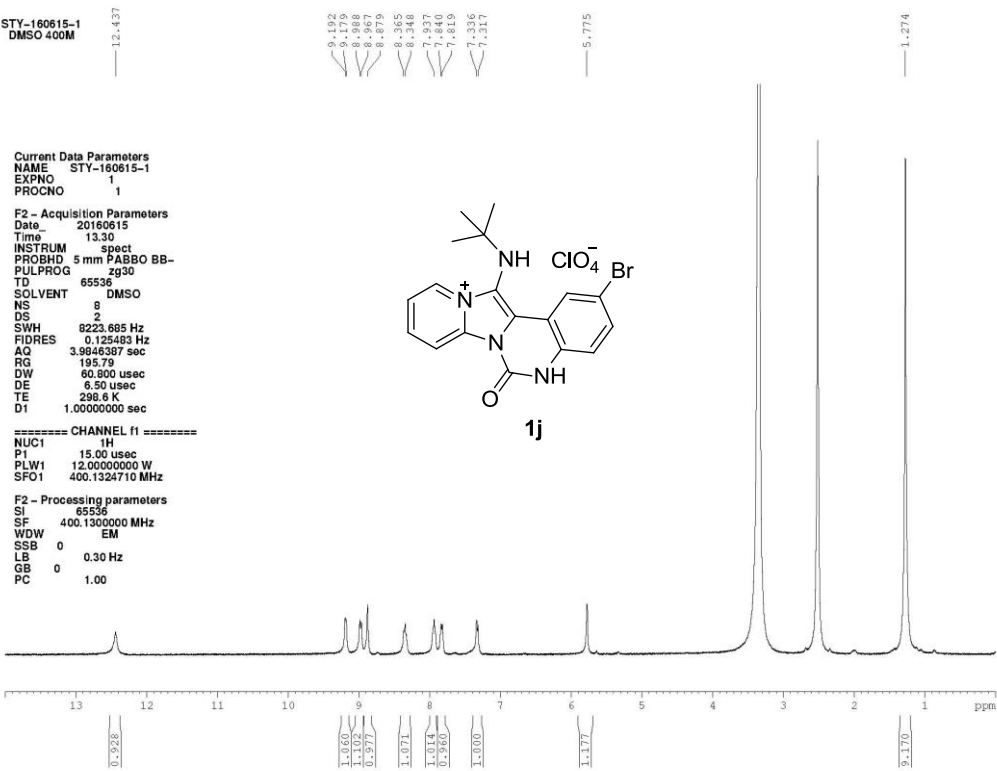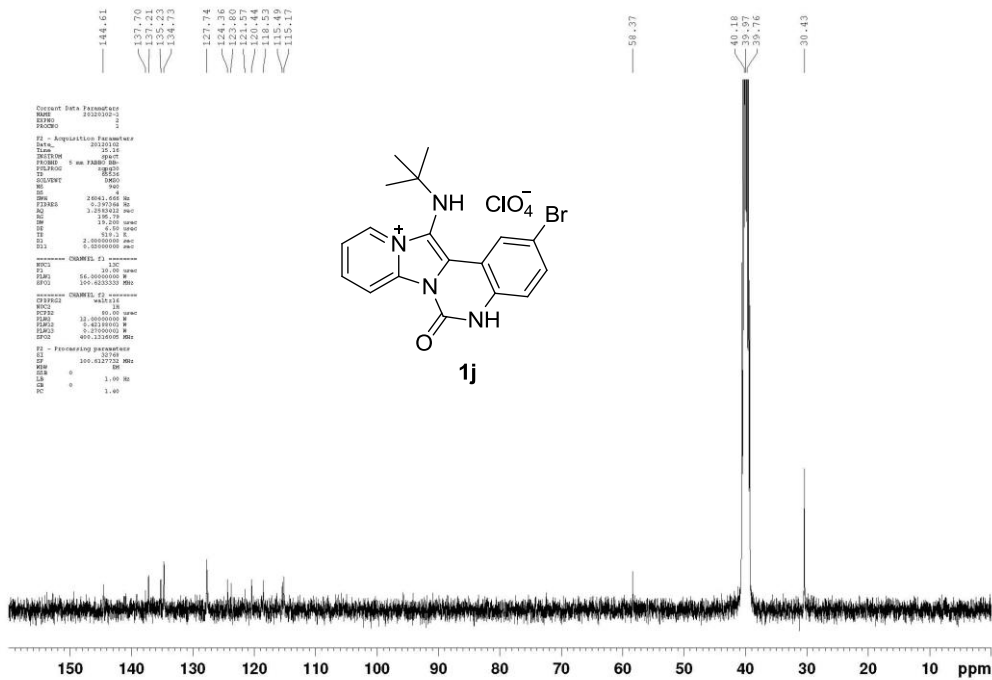

1k

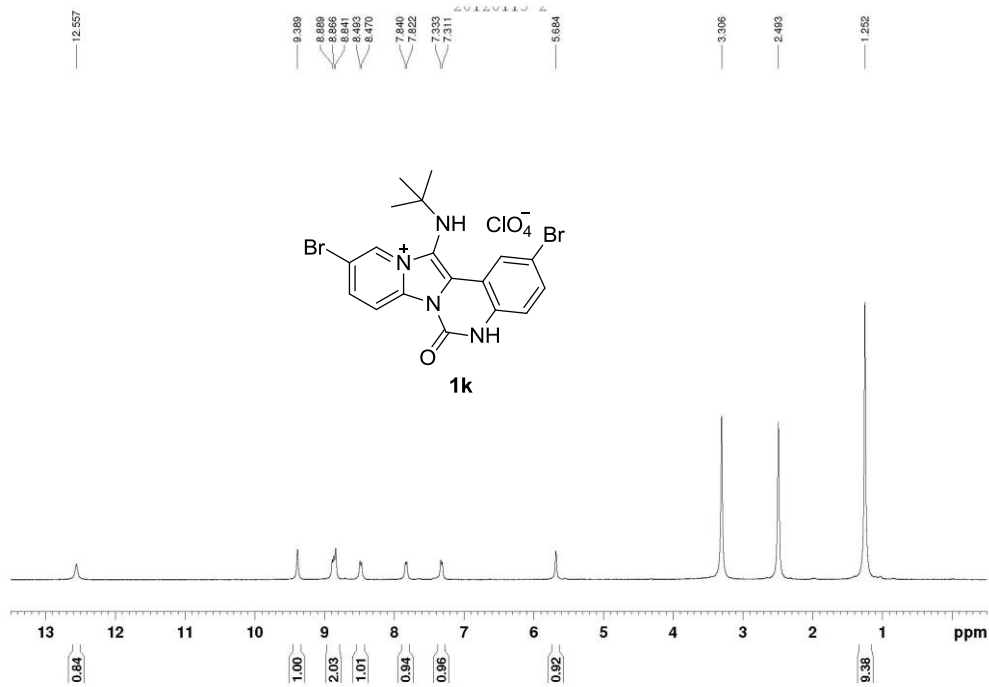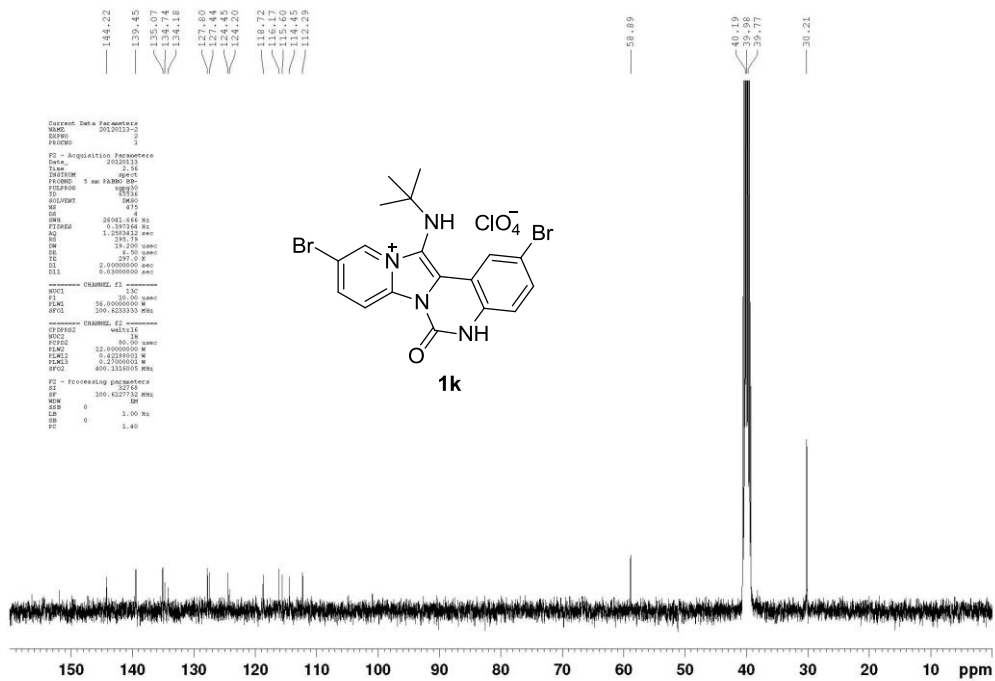

```

Current Date Parameters
NAME: 20120113-2
EXPNO: 1
PROCNO: 1
F2 - Acquisition Parameters
Date_: 20120113
Time: 7:14
INSTRUM: spect
PROBHD: 5 mm QNP1H
PULPROG: zgpg30
SI: 32768
AQ: 0.020000000
RG: 512
AQ2: 0.020000000
SI2: 32768
RG2: 512
SFO: 400.1363500 MHz
NUC1: 13C
NUC2: 13C
PROBHD2: 5 mm QNP1H
PULPROG2: zgpg30
SI2: 32768
AQ2: 0.020000000
RG2: 512
SFO2: 101.2518150 MHz
===== CHANNEL f1 =====
NUC1: 13C
P1: 12.00
PL1: 0.00000000 W
SFO1: 101.2518150 MHz
===== CHANNEL f2 =====
CPDPRG2: zgpg30
NUC2: 13C
P2: 12.00
PL2: 0.00000000 W
SFO2: 101.2518150 MHz
===== CHANNEL f3 =====
CPDPRG3: zgpg30
NUC3: 13C
P3: 12.00
PL3: 0.00000000 W
SFO3: 101.2518150 MHz
F2 - Processing parameters
SI: 32768
AQ: 0.020000000
RG: 512
SFO: 400.1363500 MHz
  
```



11

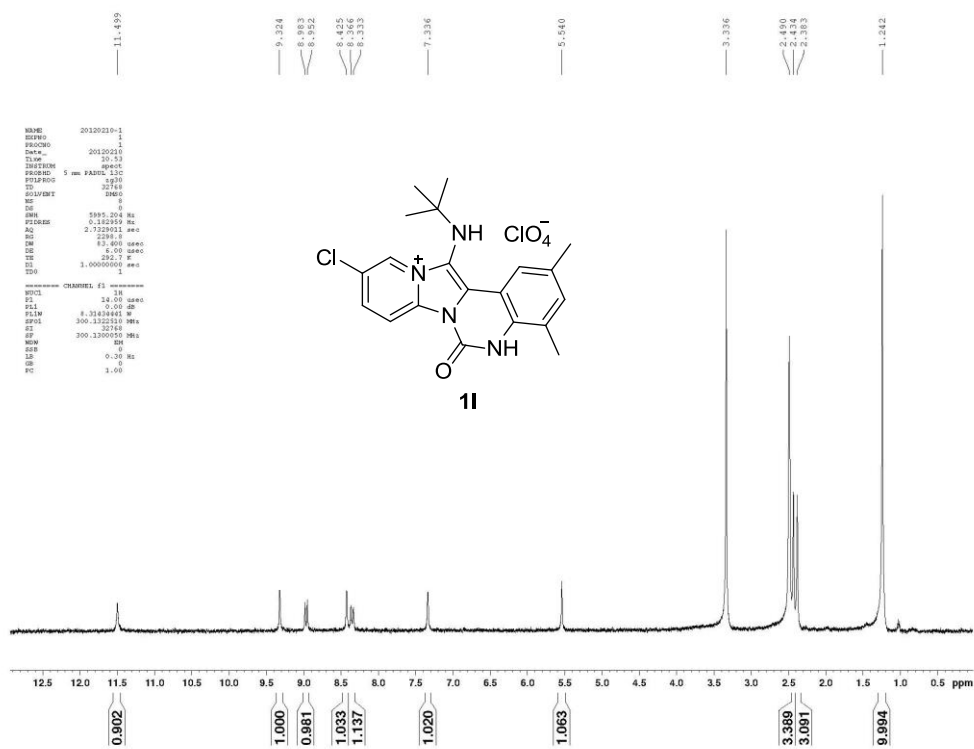

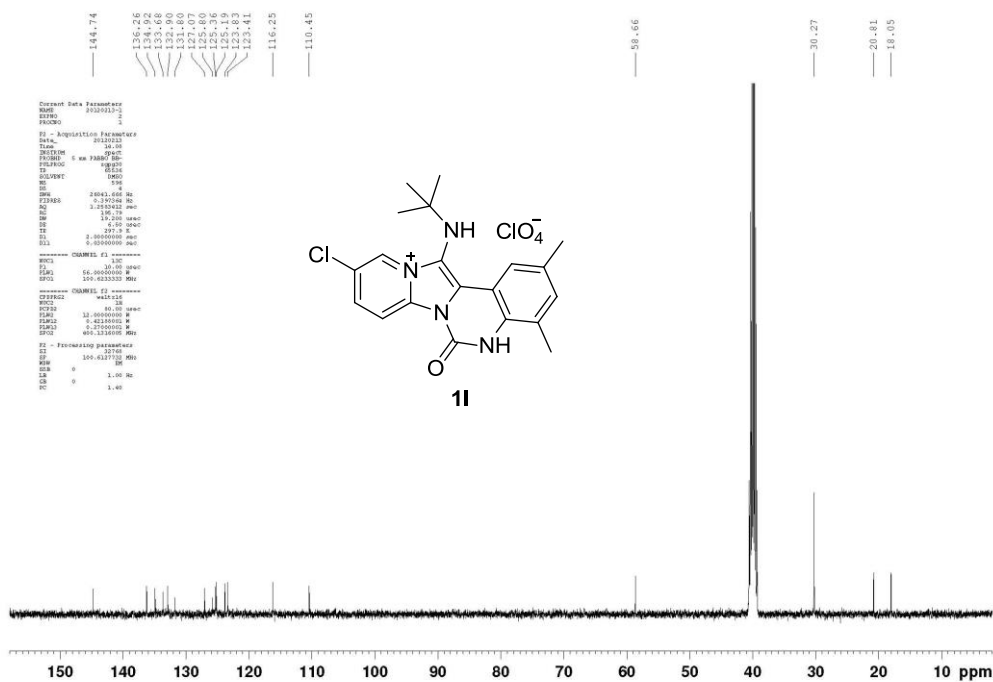

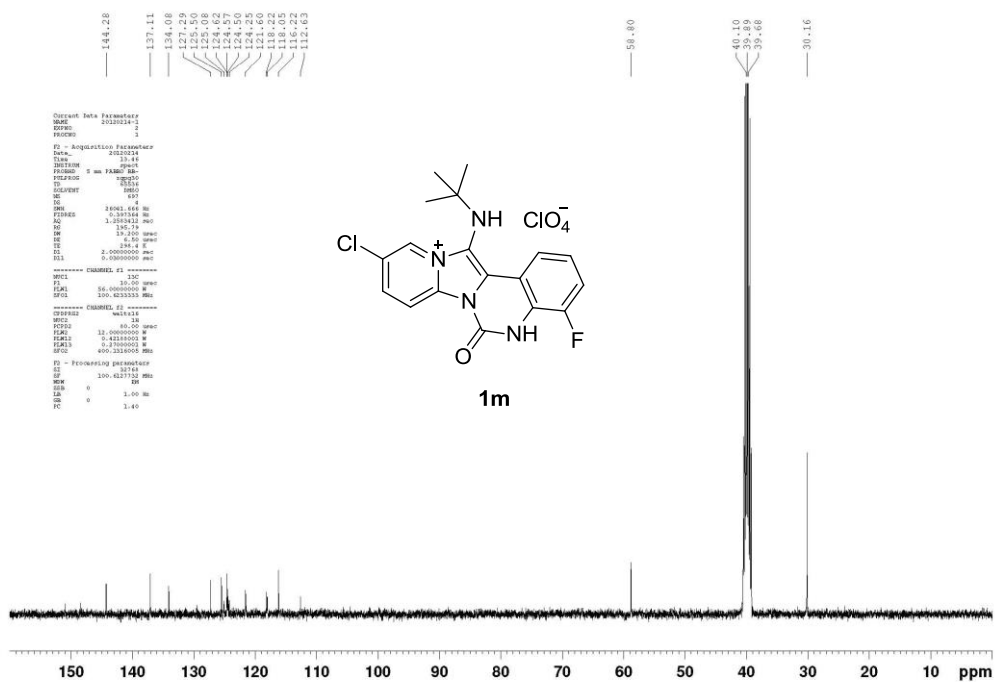

**1n**

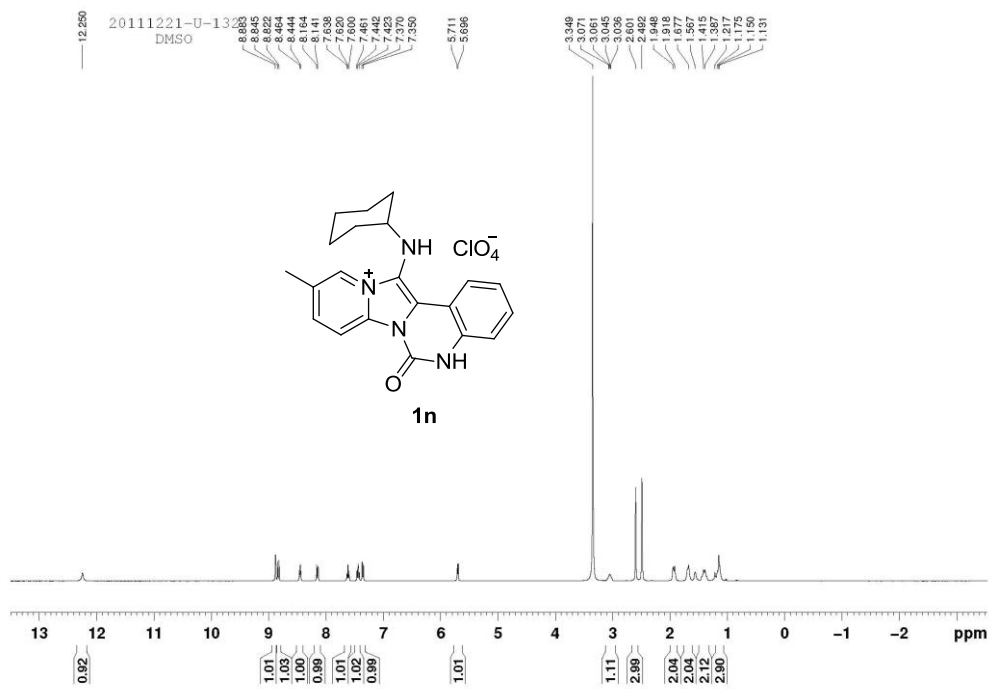

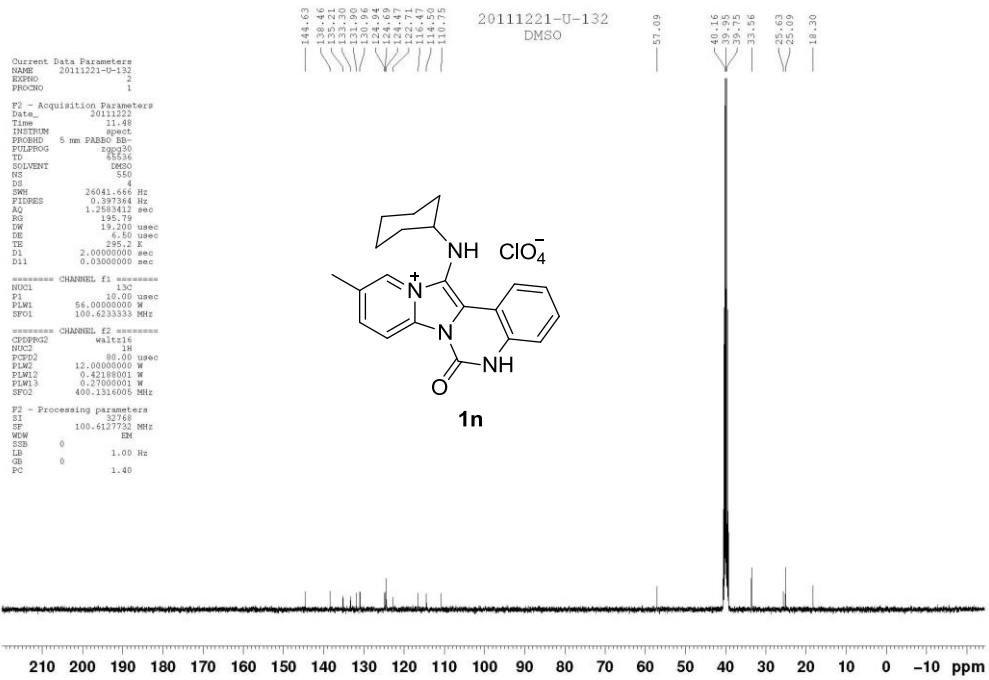

10

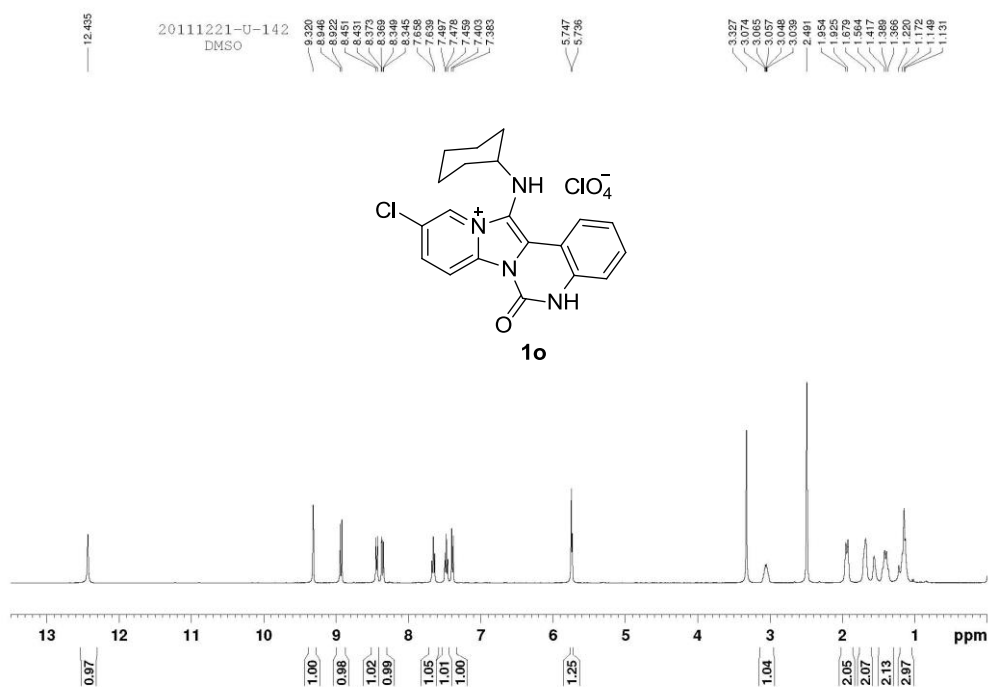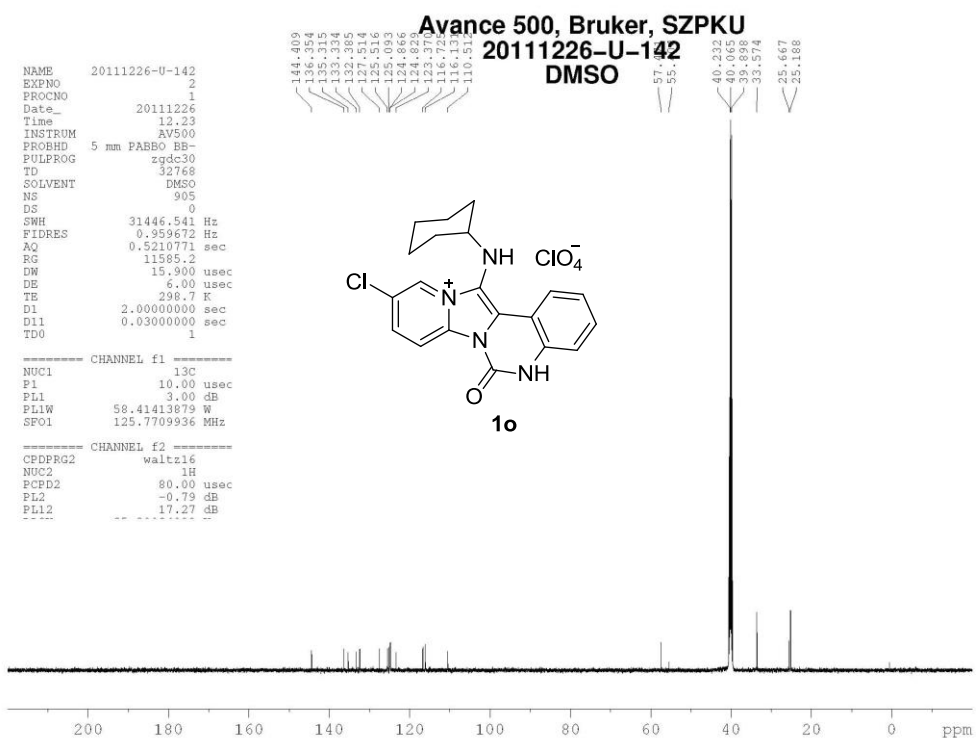

20120109-U-182

```

NAME      20120109-U-182
EXPNO    1
PROCNO   1
Date_    20120109
Time     16.56
INSTRUM  spect
PROBHD   5 mm PABD1 13C
PULPROG  zg30
TD       32768
SOLVENT  DMSO
NS       0
DS       0
SWH      5995.204 Hz
FIDRES   0.182959 Hz
AQ       2.732911 sec
RG       2896.3
DW       83.400 usec
DE       6.00 usec
TE       292.8 K
D1       1.0000000 sec
D11      1
TD0      1
  
```

```

----- CHANNEL f1 -----
NUC1     1H
P1       14.00 usec
PL1      0.00 dB
PL1W     8.31434441 W
SFO1     300.1322310 MHz
SF       300.1300045 MHz
WDW      EM
SSB      0
LB       0.30 Hz
GB       0
PC       0.10
  
```

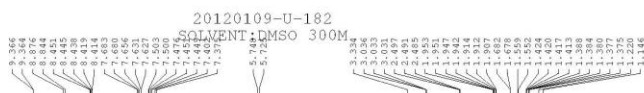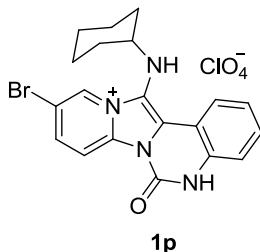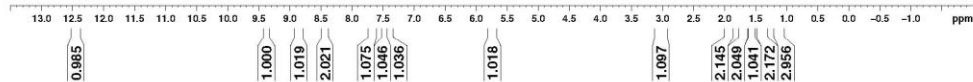

20120109-U-182

```

NAME      20120109-U-182
EXPNO    2
PROCNO   1
Date_    20120109
Time     17.21
INSTRUM  AV500
PROBHD   5 mm PABBO BB-
PULPROG  zgdc30
TD       32768
SOLVENT  DMSO
NS       285
DS       0
SWH      31446.541 MHz
FIDRES   0.959672 MHz
AQ       0.5210771 sec
RG       11585.2
DW       15.900 usec
DE       6.00 usec
TE       300.2 K
D1       2.00000000 sec
D11      0.03000000 sec
TD0      1
  
```

```

----- CHANNEL f1 -----
NUC1     13C
P1       10.00 usec
PL1      3.00 dB
PL1W     58.41413879 W
SFO1     125.7709936 MHz
  
```

```

----- CHANNEL f2 -----
CPDPRG2  waltz16
NUC2     1H
PCPD2    80.00 usec
PL2      -0.79 dB
PL12     17.27 usec
PL2W     25.30924968 W
PL12W    0.39562091 W
SFO2     500.1320005 MHz
  
```

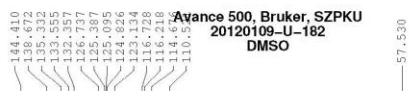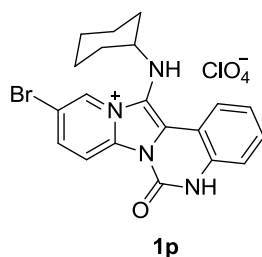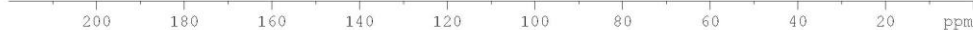

1q

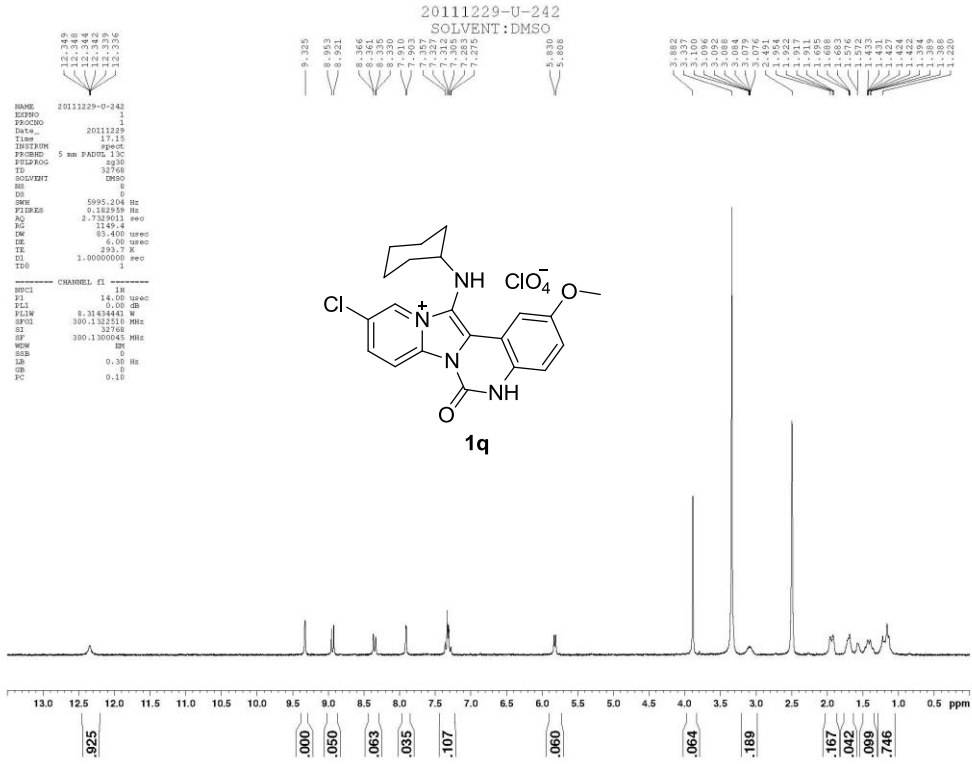

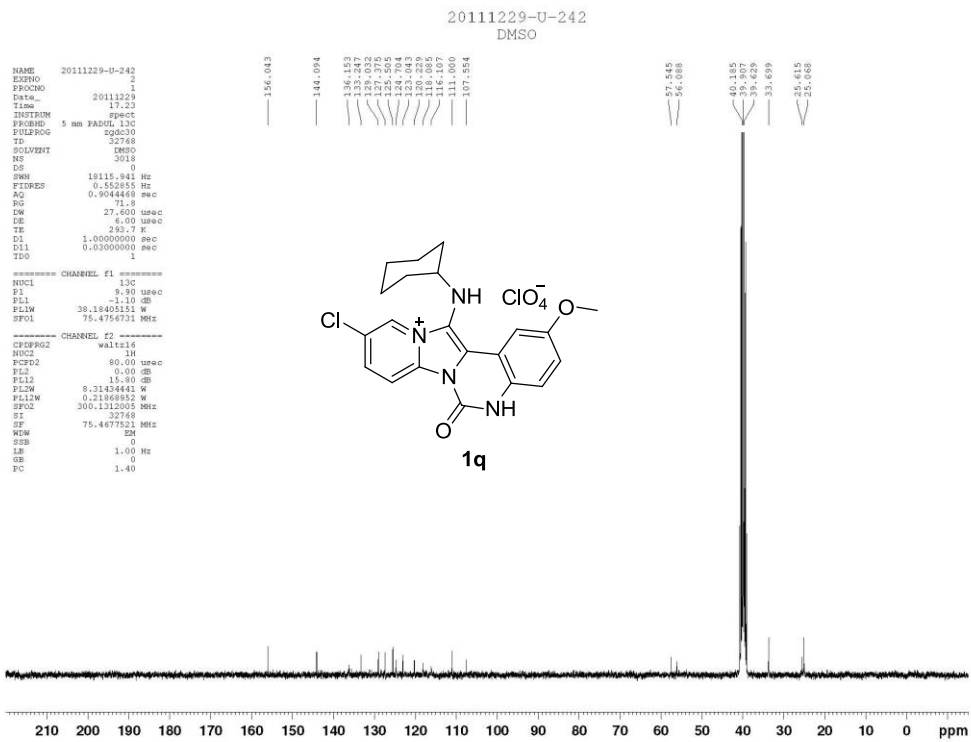

1r



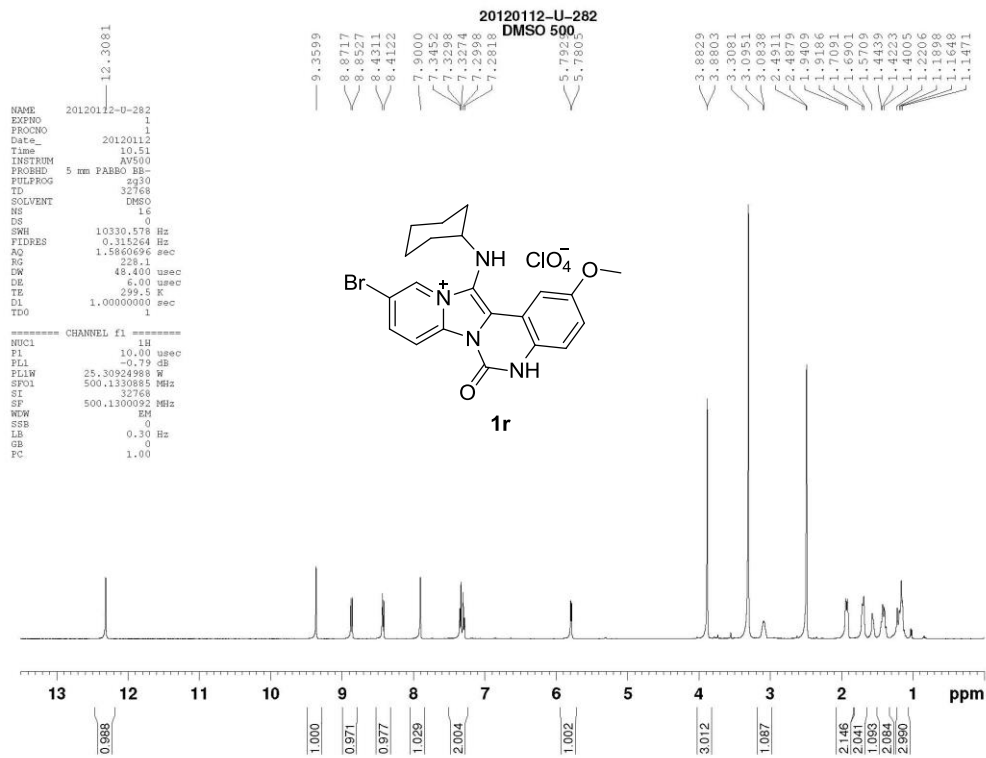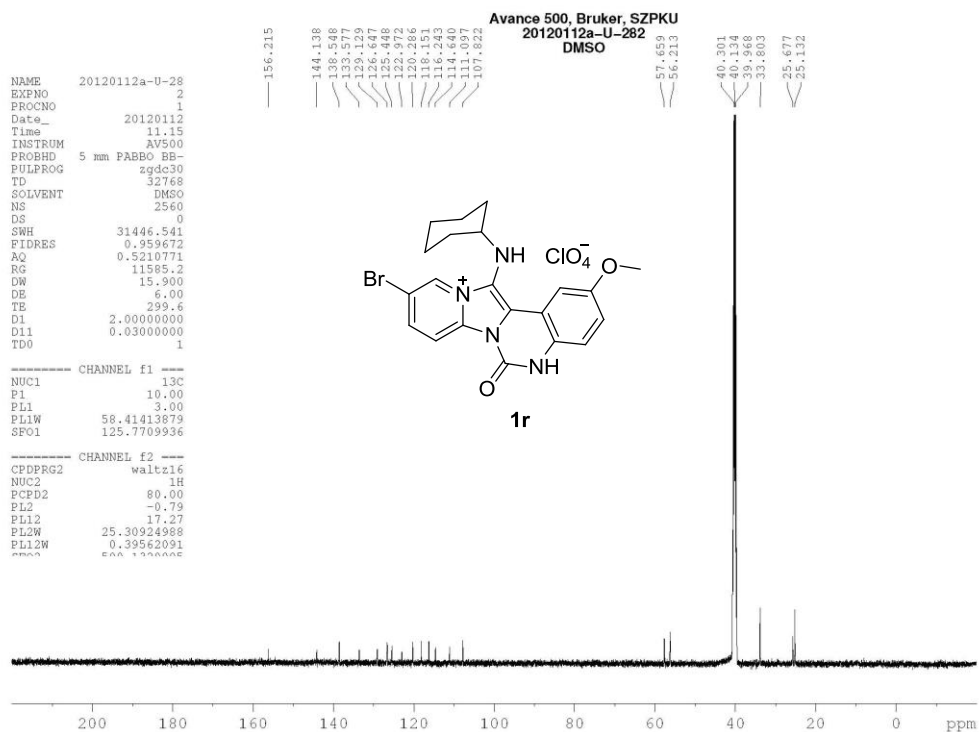

1s

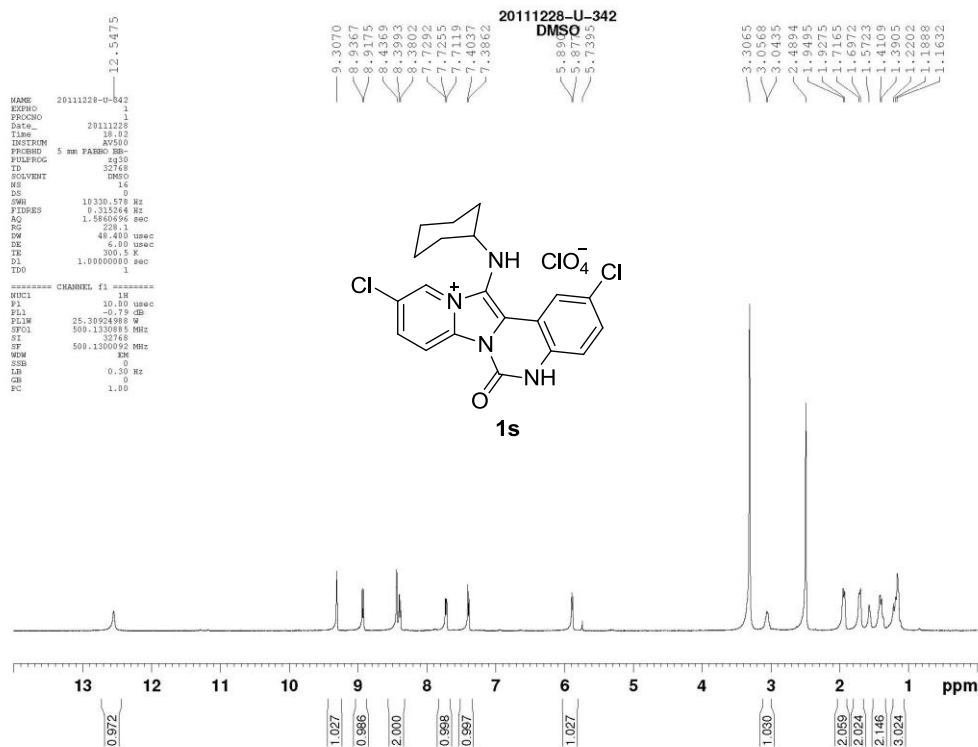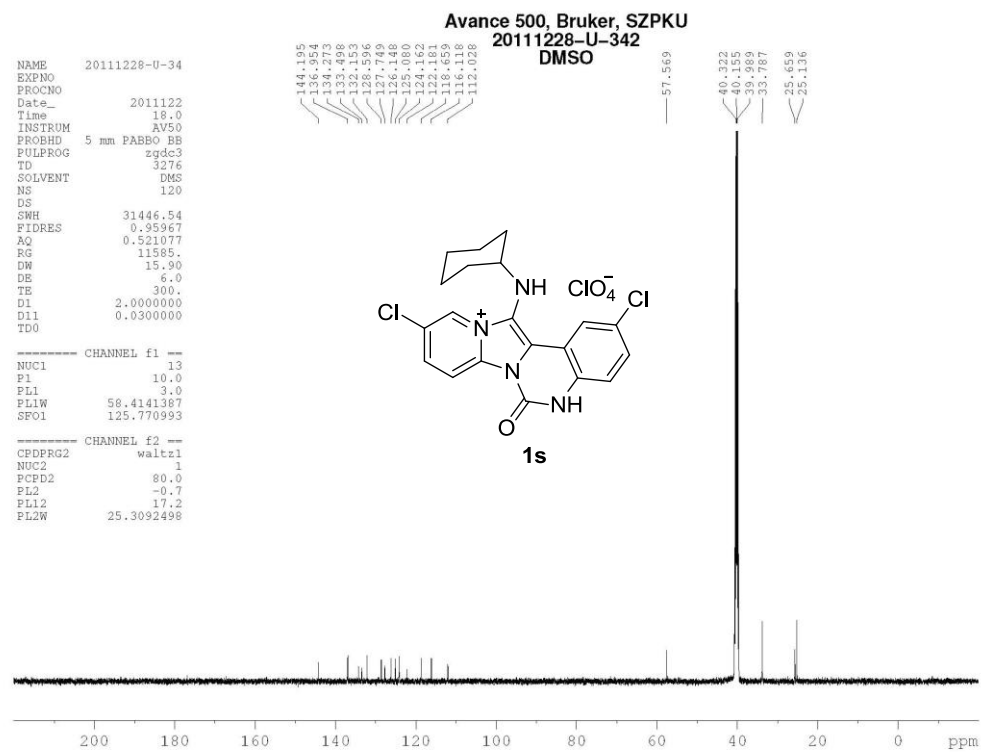

1t

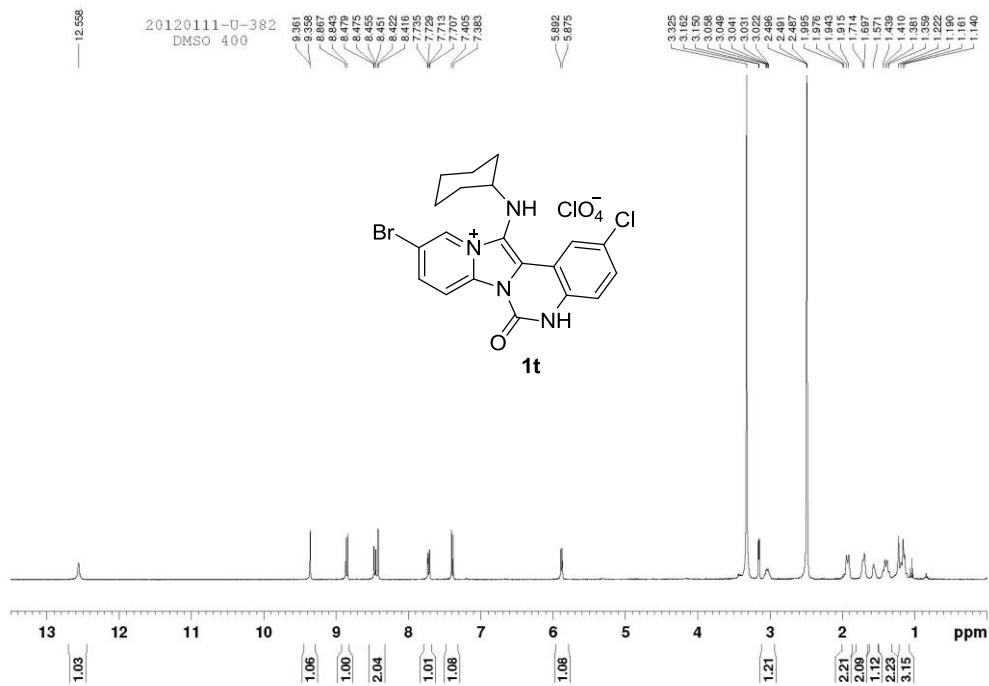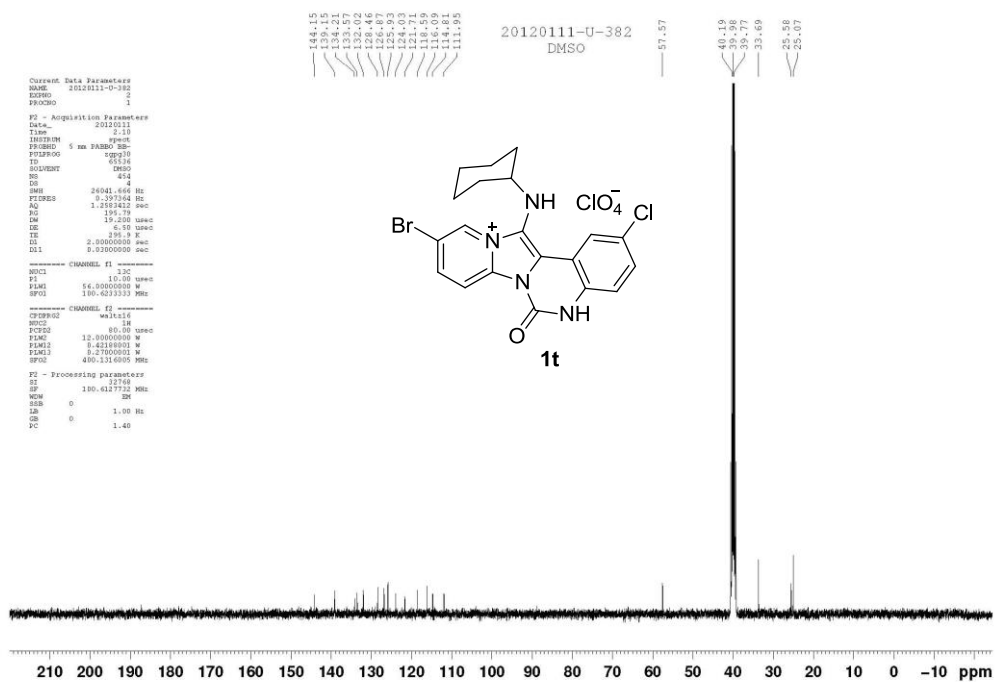

```

Current Data Parameters
NAME: 20120111-U-382
EXPNO: 2
PROCNO: 1
PG - Acquisition Parameters
Date_: 20120111
Time: 2.10
INSTRUM: spect
PROBHD: 5 mm PABBO BB-
PULPROG: zgpg30
TD: 65536
SOLVENT: DMSO
DS: 4
AQ: 24041.666 Hz
F2RES: 9.397864 Hz
RG: 1.1253422 sec
AQ: 199.79
SI: 19.026 usec
DE: 6.50 usec
TE: 300.2 K
DQ: 2.00000000 sec
DELTA: 0.00000000 sec
----- CHANNEL f1 -----
NUC1: 13C
P1: 19.00 usec
PL1: 0.00000000 W
SFO1: 100.6233333 MHz
----- CHANNEL f2 -----
CPDPRG2: waltz16
NUC2: 1H
PCPD2: 89.00 usec
PLM2: 10.00000000 W
PLM1: 0.01480001 W
PLM3: 0.00000000 W
SFO2: 400.1316995 MHz
PG - Processing parameters
SI: 32768
SF: 100.623732 MHz
WDW: EM
SSB: 0
LB: 1.00 Hz
GB: 0
PC: 1.40
  
```

1u

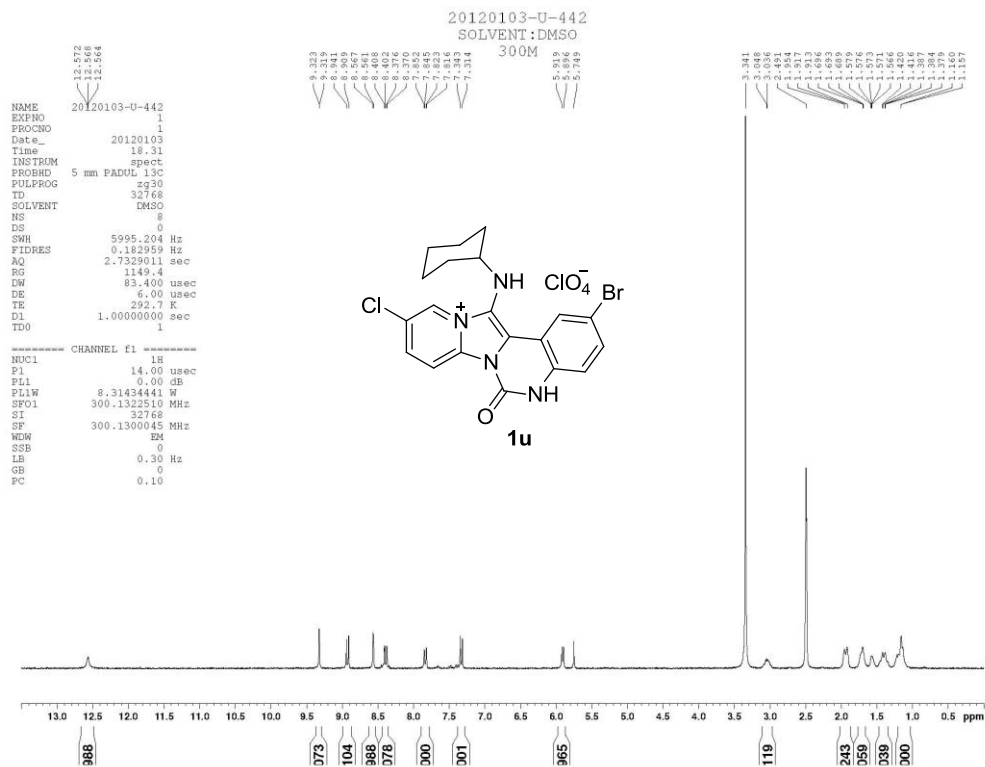

NAME 20120103-U-442  
 EXPNO 2  
 PROCNO 1  
 Date\_ 20120103  
 Time 18.41  
 INSTRUM spect  
 PROBHD 5 mm PABUL 13C  
 PULPROG zgpg30  
 TD 32768  
 SOLVENT DMSO  
 NS 4055  
 DS 0  
 SWH 16115.941 Hz  
 FIDRES 0.552855 Hz  
 AQ 0.9044468 sec  
 RG 71.8  
 DW 27.600 usec  
 DE 6.00 usec  
 TE 292.5 K  
 D1 1.00000000 sec  
 D11 0.03000000 sec  
 TDO 1

===== CHANNEL f1 =====  
 NUC1 13C  
 P1 9.20 usec  
 PL1 -1.10 dB  
 FLLW 38.18405151 W  
 SFO1 75.4756731 MHz

===== CHANNEL f2 =====  
 CPDPRG2 waltz16  
 NUC2 1H  
 PCPD2 80.00 usec  
 PL2 0.00 dB  
 PL12 15.80 dB  
 FLLW 8.31434441 W  
 FLLW2 0.21868952 W  
 SFO2 300.1312005 MHz  
 SI 32768  
 SF 75.4677521 MHz  
 MW 0  
 SSB 0  
 LB 1.00 Hz  
 GB 0  
 PC 1.40

20120103-U-442  
DMSO

144.154  
 136.840  
 134.482  
 133.337  
 127.002  
 126.069  
 118.745  
 121.768  
 115.394  
 112.353

57.528

46.179

39.433

33.704

25.587

25.074

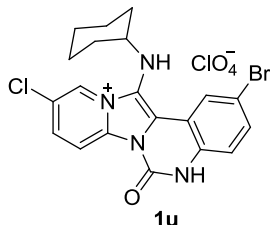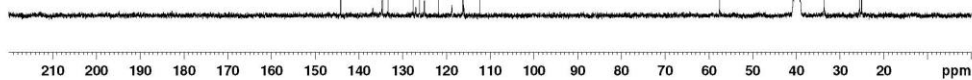

1v

NAME 20120113a-U-482  
 EXPNO 1  
 PROCNO 1  
 Date\_ 20120113  
 Time 9.53  
 INSTRUM AV500  
 PROBHD 5 mm PABEO BB-  
 PULPROG zg30  
 TD 32768  
 SOLVENT DMSO  
 NS 16  
 DS 0  
 SWH 10330.578 Hz  
 FIDRES 0.315264 Hz  
 AQ 1.5800696 sec  
 RG 322.5  
 DW 48.400 usec  
 DE 6.00 usec  
 TE 300.4 K  
 D1 1.00000000 sec  
 TDO 1

===== CHANNEL f1 =====  
 NUC1 1H  
 P1 10.00 usec  
 PL1 -0.19 dB  
 FLLW 25.30924988 W  
 SFO1 500.1330885 MHz  
 SI 32768  
 SF 500.1300092 MHz  
 MW 0  
 SSB 0  
 LB 0.30 Hz  
 GB 0  
 PC 1.00

20120113a-U-482  
DMSO 500

9.3543  
 8.8617  
 8.8428  
 8.5505  
 8.4679  
 8.4490  
 7.8350  
 7.8173  
 7.3362  
 7.3187

3.873

3.861

3.3014

3.0528

3.0381

3.0314

2.4922

2.4897

1.9367

1.9131

1.7199

1.7021

1.5746

1.4128

1.3903

1.2246

1.1476

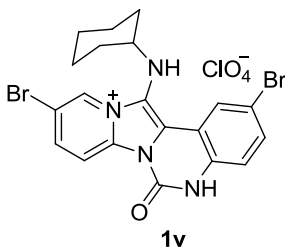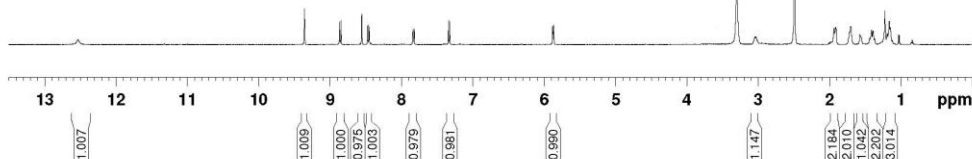





1x

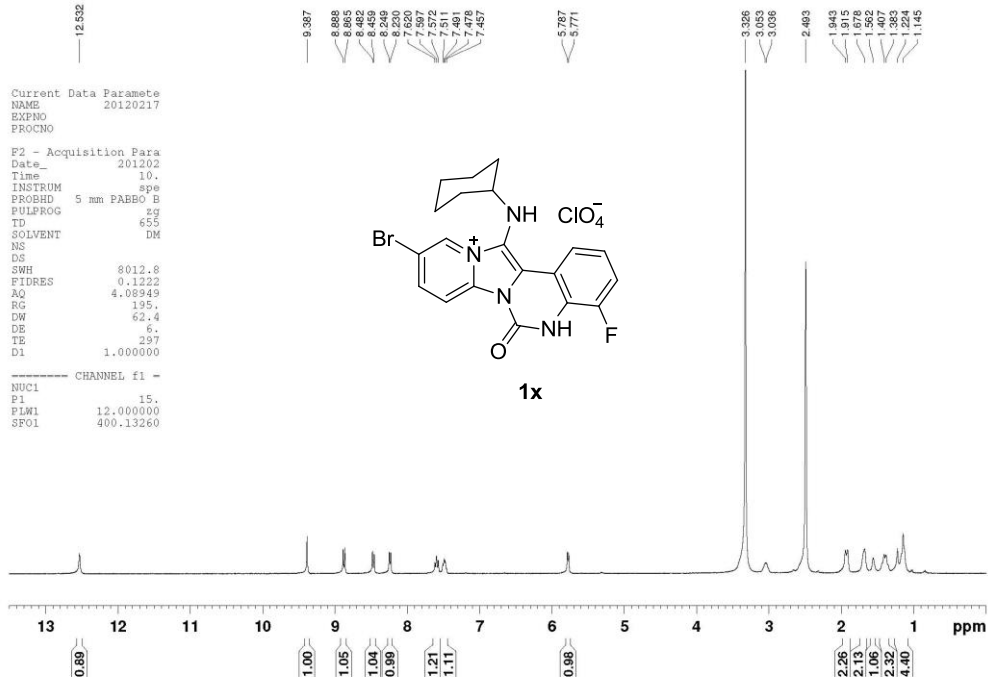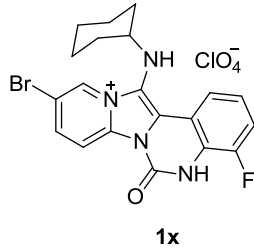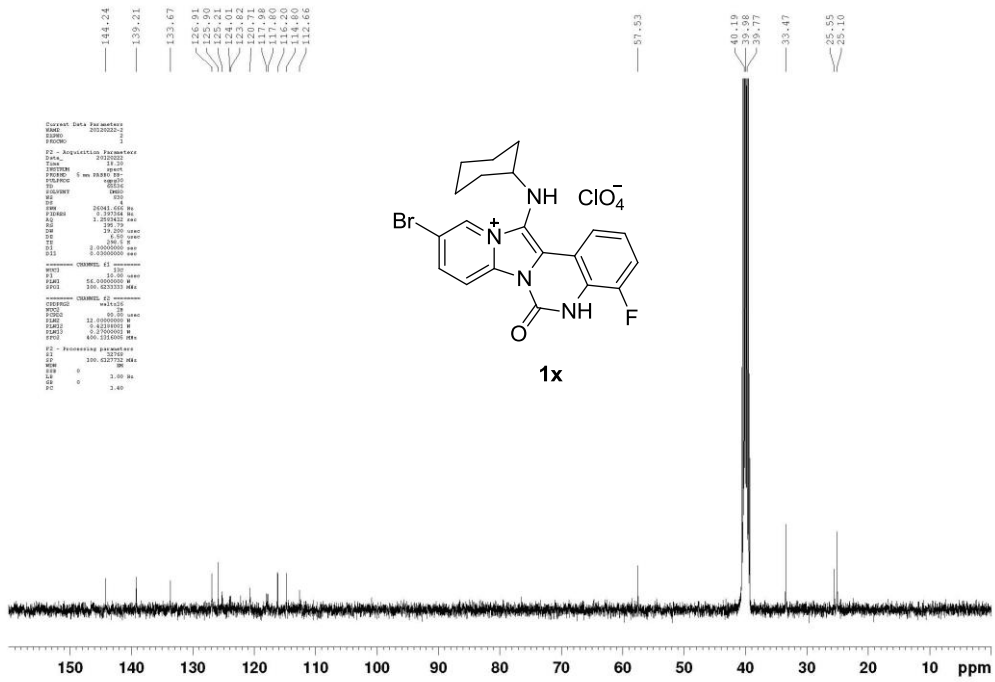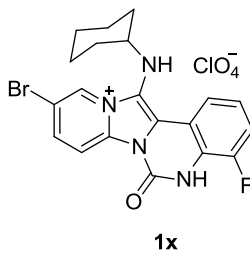



1y

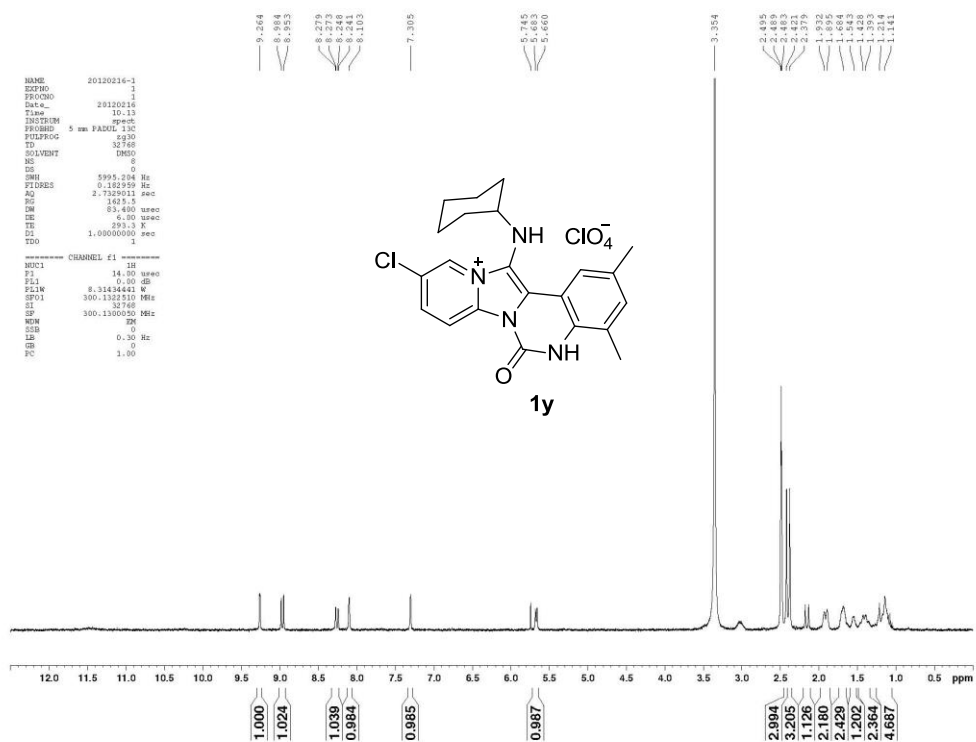

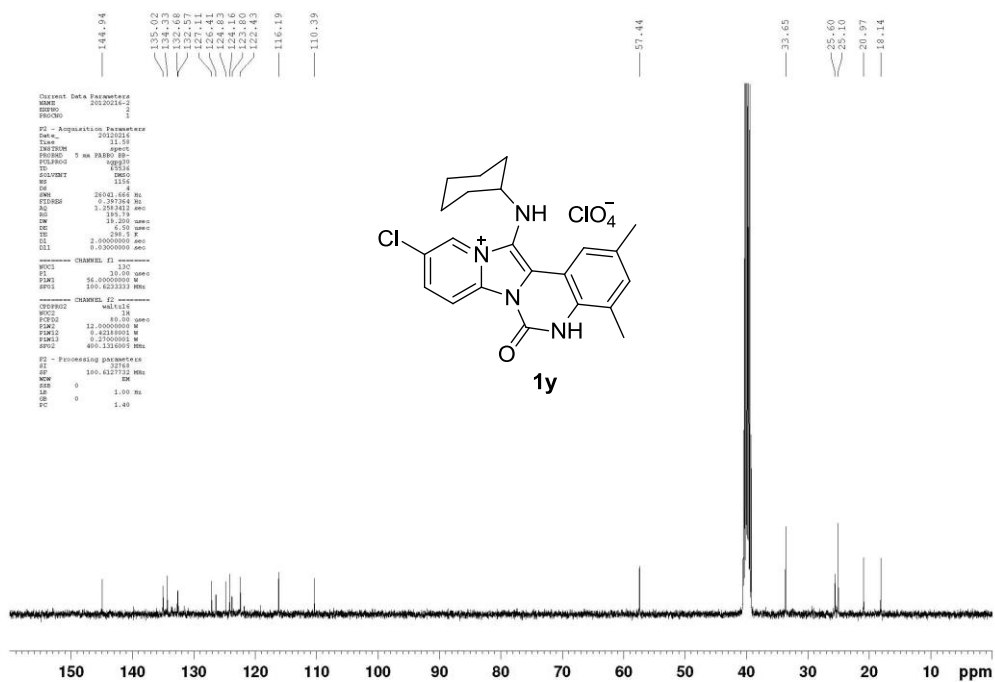

**X-ray data for compound 1o**

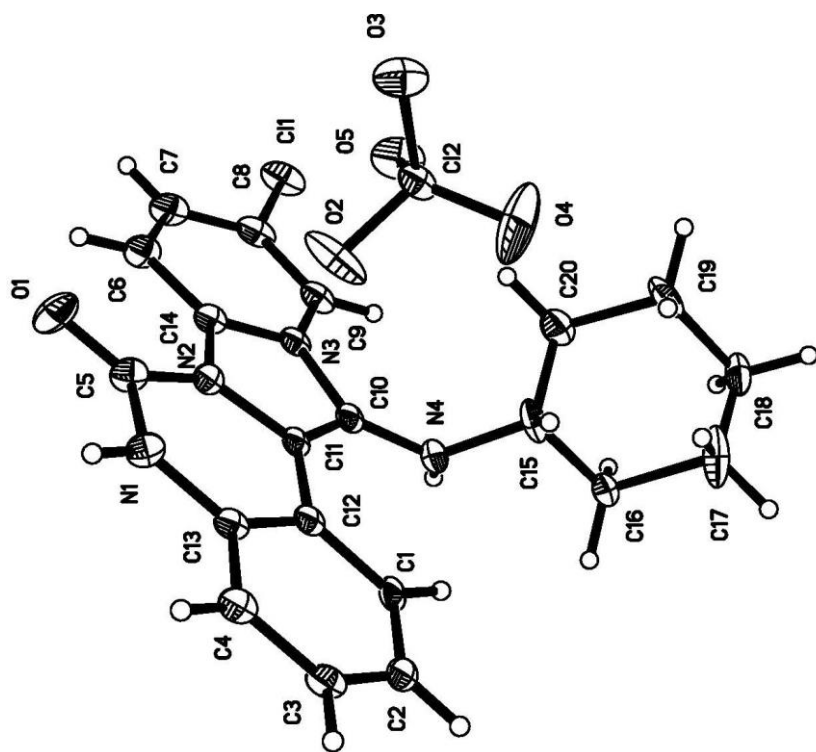

ORTEP structure for compound **1o**

**Table 1.** Crystal data and structure refinement for compound **1o**.

|                                   |                                                                               |                  |
|-----------------------------------|-------------------------------------------------------------------------------|------------------|
| Identification code               | 03071a                                                                        |                  |
| Empirical formula                 | C <sub>20</sub> H <sub>20</sub> Cl <sub>2</sub> N <sub>4</sub> O <sub>5</sub> |                  |
| Formula weight                    | 467.30                                                                        |                  |
| Temperature                       | 150(2) K                                                                      |                  |
| Wavelength                        | 1.54184 Å                                                                     |                  |
| Crystal system                    | Monoclinic                                                                    |                  |
| Space group                       | P 21/c                                                                        |                  |
| Unit cell dimensions              | a = 9.9958(2) Å                                                               | α = 90°.         |
|                                   | b = 15.0623(3) Å                                                              | β = 119.167(2)°. |
|                                   | c = 15.2761(4) Å                                                              | γ = 90°.         |
| Volume                            | 2008.34(8) Å <sup>3</sup>                                                     |                  |
| Z                                 | 4                                                                             |                  |
| Density (calculated)              | 1.545 Mg/m <sup>3</sup>                                                       |                  |
| Absorption coefficient            | 3.287 mm <sup>-1</sup>                                                        |                  |
| F(000)                            | 968                                                                           |                  |
| Crystal size                      | 0.38 x 0.34 x 0.25 mm <sup>3</sup>                                            |                  |
| Theta range for data collection   | 4.43 to 66.86°.                                                               |                  |
| Index ranges                      | -11 ≤ h ≤ 11, -14 ≤ k ≤ 17, -18 ≤ l ≤ 18                                      |                  |
| Reflections collected             | 10354                                                                         |                  |
| Independent reflections           | 3542 [R(int) = 0.0349]                                                        |                  |
| Completeness to theta = 66.86°    | 99.6 %                                                                        |                  |
| Absorption correction             | Semi-empirical from equivalents                                               |                  |
| Max. and min. transmission        | 0.4937 and 0.3681                                                             |                  |
| Refinement method                 | Full-matrix least-squares on F <sup>2</sup>                                   |                  |
| Data / restraints / parameters    | 3542 / 24 / 366                                                               |                  |
| Goodness-of-fit on F <sup>2</sup> | 1.095                                                                         |                  |
| Final R indices [I > 2σ(I)]       | R1 = 0.0535, wR2 = 0.1350                                                     |                  |

R indices (all data)

R1 = 0.0616, wR2 = 0.1439

Largest diff. peak and hole

0.346 and -0.858 e.Å<sup>-3</sup>

**Table 2.** Atomic coordinates ( $\times 10^4$ ) and equivalent isotropic displacement parameters ( $\text{\AA}^2 \times 10^3$ ) for compound**1o.**U(eq) is defined as one third of the trace of the orthogonalized  $U^{ij}$  tensor.

|        | x        | y        | z       | U(eq) |
|--------|----------|----------|---------|-------|
| C(1)   | 2496(3)  | 10243(2) | 3302(2) | 32(1) |
| C(2)   | 1349(3)  | 10548(2) | 3488(2) | 36(1) |
| C(3)   | 1150(3)  | 10162(2) | 4237(2) | 35(1) |
| C(4)   | 2082(3)  | 9481(2)  | 4818(2) | 32(1) |
| C(5)   | 5412(3)  | 8140(2)  | 5161(2) | 32(1) |
| C(6)   | 8023(3)  | 7772(2)  | 4638(2) | 37(1) |
| C(7)   | 8947(3)  | 7710(2)  | 4208(2) | 40(1) |
| C(8)   | 8624(3)  | 8197(2)  | 3346(2) | 36(1) |
| C(9)   | 7418(3)  | 8771(2)  | 2929(2) | 31(1) |
| C(10)  | 5204(3)  | 9391(2)  | 3079(2) | 27(1) |
| C(11)  | 4690(3)  | 9203(2)  | 3737(2) | 25(1) |
| C(12)  | 3452(3)  | 9551(2)  | 3875(2) | 27(1) |
| C(13)  | 3254(3)  | 9173(2)  | 4639(2) | 27(1) |
| C(14)  | 6757(3)  | 8335(2)  | 4174(2) | 28(1) |
| C(15)  | 3453(3)  | 9754(2)  | 1300(2) | 37(1) |
| C(16)  | 3218(13) | 10672(5) | 657(4)  | 52(3) |
| C(17)  | 1349(10) | 10290(7) | -336(5) | 61(2) |
| C(18)  | 1947(13) | 9871(8)  | -909(9) | 43(3) |
| C(19)  | 2333(14) | 8940(5)  | -272(5) | 52(2) |
| C(20)  | 3987(16) | 9194(9)  | 737(11) | 44(3) |
| C(15B) | 3453(3)  | 9754(2)  | 1300(2) | 37(1) |
| C(16B) | 2551(11) | 10483(6) | 753(6)  | 39(2) |
| C(17B) | 1916(14) | 10566(7) | -422(6) | 49(3) |

|        |          |          |          |        |
|--------|----------|----------|----------|--------|
| C(18B) | 2252(17) | 9620(9)  | -859(12) | 35(3)  |
| C(19B) | 2963(13) | 8914(11) | -311(9)  | 64(4)  |
| C(20B) | 3830(20) | 9007(10) | 797(14)  | 50(5)  |
| Cl(1)  | 9776(1)  | 8073(1)  | 2807(1)  | 47(1)  |
| N(1)   | 4211(3)  | 8495(2)  | 5223(2)  | 31(1)  |
| N(2)   | 5631(2)  | 8553(1)  | 4400(2)  | 26(1)  |
| N(3)   | 6496(2)  | 8830(1)  | 3364(2)  | 26(1)  |
| N(4)   | 4695(3)  | 9980(2)  | 2310(2)  | 35(1)  |
| O(1)   | 6240(2)  | 7555(1)  | 5675(2)  | 46(1)  |
| Cl(2)  | 2792(1)  | 7038(1)  | 2155(1)  | 33(1)  |
| O(2)   | 3053(4)  | 7401(3)  | 3097(3)  | 72(1)  |
| O(3)   | 2480(5)  | 6082(3)  | 2161(4)  | 50(1)  |
| O(4)   | 1580(5)  | 7456(4)  | 1388(4)  | 106(2) |
| O(5)   | 4181(3)  | 7094(2)  | 2121(3)  | 49(1)  |
| Cl(2B) | 2792(1)  | 7038(1)  | 2155(1)  | 33(1)  |
| O(2B)  | 4164(18) | 7195(10) | 2911(11) | 78(5)  |
| O(3B)  | 2014(19) | 6292(10) | 1917(13) | 39(4)  |
| O(4B)  | 1700(20) | 7652(12) | 2041(18) | 93(7)  |
| O(5B)  | 2822(17) | 7331(7)  | 1133(9)  | 58(4)  |

---

**Table 3.** Bond lengths [Å] and angles [°] for compound **1o**.

---

|             |          |
|-------------|----------|
| C(1)-C(2)   | 1.387(4) |
| C(1)-C(12)  | 1.397(4) |
| C(1)-H(1)   | 0.9500   |
| C(2)-C(3)   | 1.382(4) |
| C(2)-H(2)   | 0.9500   |
| C(3)-C(4)   | 1.379(4) |
| C(3)-H(3)   | 0.9500   |
| C(4)-C(13)  | 1.404(3) |
| C(4)-H(4)   | 0.9500   |
| C(5)-O(1)   | 1.203(3) |
| C(5)-N(1)   | 1.358(3) |
| C(5)-N(2)   | 1.426(3) |
| C(6)-C(7)   | 1.373(4) |
| C(6)-C(14)  | 1.395(4) |
| C(6)-H(6)   | 0.9500   |
| C(7)-C(8)   | 1.400(5) |
| C(7)-H(7)   | 0.9500   |
| C(8)-C(9)   | 1.363(4) |
| C(8)-Cl(1)  | 1.723(3) |
| C(9)-N(3)   | 1.377(3) |
| C(9)-H(9)   | 0.9500   |
| C(10)-N(4)  | 1.359(4) |
| C(10)-C(11) | 1.361(4) |
| C(10)-N(3)  | 1.423(3) |
| C(11)-N(2)  | 1.394(3) |
| C(11)-C(12) | 1.450(3) |
| C(12)-C(13) | 1.397(4) |



|               |           |
|---------------|-----------|
| C(13)-N(1)    | 1.387(4)  |
| C(14)-N(3)    | 1.357(4)  |
| C(14)-N(2)    | 1.368(3)  |
| C(15)-N(4)    | 1.473(3)  |
| C(15)-C(20)   | 1.479(14) |
| C(15)-C(16)   | 1.645(9)  |
| C(15)-H(15A)  | 1.0000    |
| C(16)-C(17)   | 1.833(14) |
| C(16)-H(16A)  | 0.9900    |
| C(16)-H(16B)  | 0.9900    |
| C(17)-C(18)   | 1.425(15) |
| C(17)-H(17A)  | 0.9900    |
| C(17)-H(17B)  | 0.9900    |
| C(18)-C(19)   | 1.641(15) |
| C(18)-H(18A)  | 0.9900    |
| C(18)-H(18B)  | 0.9900    |
| C(19)-C(20)   | 1.664(17) |
| C(19)-H(19A)  | 0.9900    |
| C(19)-H(19B)  | 0.9900    |
| C(20)-H(20A)  | 0.9900    |
| C(20)-H(20B)  | 0.9900    |
| C(16B)-C(17B) | 1.591(12) |
| C(16B)-H(16C) | 0.9900    |
| C(16B)-H(16D) | 0.9900    |
| C(17B)-C(18B) | 1.675(16) |
| C(17B)-H(17C) | 0.9900    |
| C(17B)-H(17D) | 0.9900    |
| C(18B)-C(19B) | 1.326(19) |
| C(18B)-H(18C) | 0.9900    |

|                 |          |
|-----------------|----------|
| C(18B)-H(18D)   | 0.9900   |
| C(19B)-C(20B)   | 1.48(2)  |
| C(19B)-H(19C)   | 0.9900   |
| C(19B)-H(19D)   | 0.9900   |
| C(20B)-H(20C)   | 0.9900   |
| C(20B)-H(20D)   | 0.9900   |
| N(1)-H(1A)      | 0.84(3)  |
| N(4)-H(4A)      | 0.7692   |
| Cl(2)-O(4)      | 1.362(4) |
| Cl(2)-O(5)      | 1.417(2) |
| Cl(2)-O(2)      | 1.439(3) |
| Cl(2)-O(3)      | 1.474(4) |
| C(2)-C(1)-C(12) | 120.0(3) |
| C(2)-C(1)-H(1)  | 120.0    |
| C(12)-C(1)-H(1) | 120.0    |
| C(3)-C(2)-C(1)  | 119.9(3) |
| C(3)-C(2)-H(2)  | 120.1    |
| C(1)-C(2)-H(2)  | 120.1    |
| C(4)-C(3)-C(2)  | 121.4(2) |
| C(4)-C(3)-H(3)  | 119.3    |
| C(2)-C(3)-H(3)  | 119.3    |
| C(3)-C(4)-C(13) | 119.1(3) |
| C(3)-C(4)-H(4)  | 120.5    |
| C(13)-C(4)-H(4) | 120.5    |
| O(1)-C(5)-N(1)  | 126.4(3) |
| O(1)-C(5)-N(2)  | 121.4(2) |
| N(1)-C(5)-N(2)  | 112.2(2) |
| C(7)-C(6)-C(14) | 117.0(3) |

|                   |          |
|-------------------|----------|
| C(7)-C(6)-H(6)    | 121.5    |
| C(14)-C(6)-H(6)   | 121.5    |
| C(6)-C(7)-C(8)    | 120.9(3) |
| C(6)-C(7)-H(7)    | 119.6    |
| C(8)-C(7)-H(7)    | 119.6    |
| C(9)-C(8)-C(7)    | 121.3(2) |
| C(9)-C(8)-Cl(1)   | 119.3(2) |
| C(7)-C(8)-Cl(1)   | 119.4(2) |
| C(8)-C(9)-N(3)    | 117.5(3) |
| C(8)-C(9)-H(9)    | 121.2    |
| N(3)-C(9)-H(9)    | 121.2    |
| N(4)-C(10)-C(11)  | 131.1(2) |
| N(4)-C(10)-N(3)   | 123.6(2) |
| C(11)-C(10)-N(3)  | 105.3(2) |
| C(10)-C(11)-N(2)  | 108.6(2) |
| C(10)-C(11)-C(12) | 133.4(2) |
| N(2)-C(11)-C(12)  | 118.0(2) |
| C(1)-C(12)-C(13)  | 119.7(2) |
| C(1)-C(12)-C(11)  | 123.4(2) |
| C(13)-C(12)-C(11) | 116.9(2) |
| N(1)-C(13)-C(12)  | 120.2(2) |
| N(1)-C(13)-C(4)   | 119.8(2) |
| C(12)-C(13)-C(4)  | 120.0(2) |
| N(3)-C(14)-N(2)   | 106.4(2) |
| N(3)-C(14)-C(6)   | 121.4(2) |
| N(2)-C(14)-C(6)   | 132.2(3) |
| N(4)-C(15)-C(20)  | 112.5(6) |
| N(4)-C(15)-C(16)  | 103.5(3) |
| C(20)-C(15)-C(16) | 96.9(7)  |

|                     |          |
|---------------------|----------|
| N(4)-C(15)-H(15A)   | 114.1    |
| C(20)-C(15)-H(15A)  | 114.1    |
| C(16)-C(15)-H(15A)  | 114.1    |
| C(15)-C(16)-C(17)   | 91.3(7)  |
| C(15)-C(16)-H(16A)  | 113.4    |
| C(17)-C(16)-H(16A)  | 113.4    |
| C(15)-C(16)-H(16B)  | 113.4    |
| C(17)-C(16)-H(16B)  | 113.4    |
| H(16A)-C(16)-H(16B) | 110.7    |
| C(18)-C(17)-C(16)   | 94.8(8)  |
| C(18)-C(17)-H(17A)  | 112.8    |
| C(16)-C(17)-H(17A)  | 112.8    |
| C(18)-C(17)-H(17B)  | 112.8    |
| C(16)-C(17)-H(17B)  | 112.8    |
| H(17A)-C(17)-H(17B) | 110.2    |
| C(17)-C(18)-C(19)   | 93.5(10) |
| C(17)-C(18)-H(18A)  | 113.0    |
| C(19)-C(18)-H(18A)  | 113.0    |
| C(17)-C(18)-H(18B)  | 113.0    |
| C(19)-C(18)-H(18B)  | 113.0    |
| H(18A)-C(18)-H(18B) | 110.4    |
| C(18)-C(19)-C(20)   | 101.1(8) |
| C(18)-C(19)-H(19A)  | 111.5    |
| C(20)-C(19)-H(19A)  | 111.5    |
| C(18)-C(19)-H(19B)  | 111.5    |
| C(20)-C(19)-H(19B)  | 111.5    |
| H(19A)-C(19)-H(19B) | 109.4    |
| C(15)-C(20)-C(19)   | 101.1(9) |
| C(15)-C(20)-H(20A)  | 111.6    |

|                      |           |
|----------------------|-----------|
| C(19)-C(20)-H(20A)   | 111.6     |
| C(15)-C(20)-H(20B)   | 111.6     |
| C(19)-C(20)-H(20B)   | 111.6     |
| H(20A)-C(20)-H(20B)  | 109.4     |
| C(17B)-C(16B)-H(16C) | 107.0     |
| C(17B)-C(16B)-H(16D) | 107.0     |
| H(16C)-C(16B)-H(16D) | 106.7     |
| C(16B)-C(17B)-C(18B) | 109.6(9)  |
| C(16B)-C(17B)-H(17C) | 109.7     |
| C(18B)-C(17B)-H(17C) | 109.7     |
| C(16B)-C(17B)-H(17D) | 109.7     |
| C(18B)-C(17B)-H(17D) | 109.7     |
| H(17C)-C(17B)-H(17D) | 108.2     |
| C(19B)-C(18B)-C(17B) | 125.4(13) |
| C(19B)-C(18B)-H(18C) | 106.0     |
| C(17B)-C(18B)-H(18C) | 106.0     |
| C(19B)-C(18B)-H(18D) | 106.0     |
| C(17B)-C(18B)-H(18D) | 106.0     |
| H(18C)-C(18B)-H(18D) | 106.3     |
| C(18B)-C(19B)-C(20B) | 118.8(13) |
| C(18B)-C(19B)-H(19C) | 107.6     |
| C(20B)-C(19B)-H(19C) | 107.6     |
| C(18B)-C(19B)-H(19D) | 107.6     |
| C(20B)-C(19B)-H(19D) | 107.6     |
| H(19C)-C(19B)-H(19D) | 107.1     |
| C(19B)-C(20B)-H(20C) | 107.4     |
| C(19B)-C(20B)-H(20D) | 107.4     |
| H(20C)-C(20B)-H(20D) | 106.9     |
| C(5)-N(1)-C(13)      | 127.0(2)  |

|                  |            |
|------------------|------------|
| C(5)-N(1)-H(1A)  | 113(2)     |
| C(13)-N(1)-H(1A) | 120(2)     |
| C(14)-N(2)-C(11) | 109.4(2)   |
| C(14)-N(2)-C(5)  | 125.0(2)   |
| C(11)-N(2)-C(5)  | 125.6(2)   |
| C(14)-N(3)-C(9)  | 121.9(2)   |
| C(14)-N(3)-C(10) | 110.3(2)   |
| C(9)-N(3)-C(10)  | 127.8(2)   |
| C(10)-N(4)-C(15) | 121.6(2)   |
| C(10)-N(4)-H(4A) | 120.6      |
| C(15)-N(4)-H(4A) | 112.4      |
| O(4)-Cl(2)-O(5)  | 114.7(3)   |
| O(4)-Cl(2)-O(2)  | 109.6(4)   |
| O(5)-Cl(2)-O(2)  | 108.07(19) |
| O(4)-Cl(2)-O(3)  | 110.8(3)   |
| O(5)-Cl(2)-O(3)  | 105.9(2)   |
| O(2)-Cl(2)-O(3)  | 107.5(3)   |

---

Symmetry transformations used to generate equivalent atoms:

**Table 4.** Anisotropic displacement parameters ( $\text{\AA}^2 \times 10^3$ ) for compound **1o**.The anisotropic displacement factor exponent takes the form:  $-2\pi^2 [ h^2 a^{*2} U^{11} + \dots + 2 h k a^* b^* U^{12} ]$ 

|        | $U^{11}$ | $U^{22}$ | $U^{33}$ | $U^{23}$ | $U^{13}$ | $U^{12}$ |
|--------|----------|----------|----------|----------|----------|----------|
| C(1)   | 18(1)    | 50(2)    | 20(1)    | -8(1)    | 1(1)     | 7(1)     |
| C(2)   | 18(1)    | 49(2)    | 28(1)    | -10(1)   | 1(1)     | 11(1)    |
| C(3)   | 16(1)    | 47(2)    | 38(2)    | -17(1)   | 11(1)    | 1(1)     |
| C(4)   | 16(1)    | 42(2)    | 35(1)    | -12(1)   | 11(1)    | -2(1)    |
| C(5)   | 24(1)    | 35(1)    | 40(2)    | -2(1)    | 18(1)    | 2(1)     |
| C(6)   | 21(1)    | 42(2)    | 44(2)    | -8(1)    | 13(1)    | 6(1)     |
| C(7)   | 19(1)    | 44(2)    | 52(2)    | -13(1)   | 14(1)    | 3(1)     |
| C(8)   | 17(1)    | 45(2)    | 47(2)    | -22(1)   | 16(1)    | -8(1)    |
| C(9)   | 20(1)    | 42(2)    | 33(1)    | -16(1)   | 14(1)    | -9(1)    |
| C(10)  | 15(1)    | 35(1)    | 23(1)    | -10(1)   | 3(1)     | 0(1)     |
| C(11)  | 13(1)    | 33(1)    | 21(1)    | -10(1)   | 2(1)     | 0(1)     |
| C(12)  | 12(1)    | 38(1)    | 25(1)    | -13(1)   | 3(1)     | 1(1)     |
| C(13)  | 15(1)    | 33(1)    | 30(1)    | -11(1)   | 8(1)     | -2(1)    |
| C(14)  | 14(1)    | 34(1)    | 31(1)    | -10(1)   | 8(1)     | -1(1)    |
| C(15)  | 20(1)    | 71(2)    | 18(1)    | -8(1)    | 7(1)     | -4(1)    |
| C(16)  | 71(6)    | 46(4)    | 20(3)    | -4(2)    | 7(3)     | 16(4)    |
| C(17)  | 38(4)    | 104(7)   | 26(3)    | 21(4)    | 4(3)     | -13(4)   |
| C(18)  | 39(5)    | 54(6)    | 22(3)    | 5(4)     | 4(3)     | -2(4)    |
| C(19)  | 65(6)    | 50(4)    | 27(3)    | -19(3)   | 11(4)    | -20(4)   |
| C(20)  | 53(4)    | 47(5)    | 32(4)    | -6(4)    | 20(3)    | -1(4)    |
| C(15B) | 20(1)    | 71(2)    | 18(1)    | -8(1)    | 7(1)     | -4(1)    |
| C(16B) | 29(4)    | 61(5)    | 21(3)    | 11(3)    | 6(3)     | -10(3)   |
| C(17B) | 53(6)    | 57(6)    | 24(4)    | -3(4)    | 9(4)     | 4(4)     |
| C(18B) | 35(5)    | 43(5)    | 23(4)    | -4(4)    | 11(4)    | -2(4)    |

|        |         |         |         |        |        |        |
|--------|---------|---------|---------|--------|--------|--------|
| C(19B) | 28(5)   | 129(11) | 40(5)   | -43(6) | 20(4)  | -22(6) |
| C(20B) | 89(9)   | 24(5)   | 26(5)   | -6(4)  | 20(5)  | -29(5) |
| Cl(1)  | 27(1)   | 59(1)   | 64(1)   | -28(1) | 30(1)  | -10(1) |
| N(1)   | 24(1)   | 34(1)   | 41(1)   | 0(1)   | 19(1)  | 3(1)   |
| N(2)   | 14(1)   | 34(1)   | 27(1)   | -5(1)  | 7(1)   | 2(1)   |
| N(3)   | 14(1)   | 35(1)   | 27(1)   | -13(1) | 8(1)   | -3(1)  |
| N(4)   | 31(1)   | 39(1)   | 24(1)   | -5(1)  | 5(1)   | 0(1)   |
| O(1)   | 39(1)   | 43(1)   | 65(1)   | 19(1)  | 33(1)  | 19(1)  |
| Cl(2)  | 19(1)   | 42(1)   | 36(1)   | -15(1) | 13(1)  | -6(1)  |
| O(2)   | 82(3)   | 93(3)   | 64(2)   | -55(2) | 53(2)  | -48(2) |
| O(3)   | 38(2)   | 39(2)   | 79(3)   | -11(2) | 34(2)  | -11(2) |
| O(4)   | 41(2)   | 145(5)  | 91(4)   | 58(4)  | -1(2)  | 20(3)  |
| O(5)   | 37(2)   | 54(2)   | 78(2)   | -11(2) | 46(2)  | -9(1)  |
| Cl(2B) | 19(1)   | 42(1)   | 36(1)   | -15(1) | 13(1)  | -6(1)  |
| O(2B)  | 72(6)   | 67(6)   | 68(6)   | -8(4)  | 12(4)  | -10(4) |
| O(3B)  | 39(6)   | 28(5)   | 45(5)   | -5(4)  | 17(4)  | -6(4)  |
| O(4B)  | 113(15) | 87(11)  | 120(16) | 24(11) | 89(14) | 66(10) |
| O(5B)  | 113(12) | 39(6)   | 60(8)   | 6(5)   | 72(8)  | 3(6)   |

---



**Table 5.** Hydrogen coordinates ( $\times 10^4$ ) and isotropic displacement parameters ( $\text{\AA}^2 \times 10^3$ ) for compound **1o**.

|        | x    | y     | z     | U(eq) |
|--------|------|-------|-------|-------|
| H(1)   | 2630 | 10505 | 2784  | 39    |
| H(2)   | 702  | 11021 | 3102  | 43    |
| H(3)   | 354  | 10370 | 4354  | 42    |
| H(4)   | 1933 | 9223  | 5331  | 38    |
| H(6)   | 8236 | 7447  | 5225  | 44    |
| H(7)   | 9817 | 7331  | 4499  | 48    |
| H(9)   | 7222 | 9118  | 2359  | 38    |
| H(15A) | 2499 | 9534  | 1285  | 45    |
| H(16A) | 3984 | 10749 | 430   | 62    |
| H(16B) | 3156 | 11212 | 1006  | 62    |
| H(17A) | 850  | 9866  | -90   | 73    |
| H(17B) | 644  | 10785 | -699  | 73    |
| H(18A) | 2873 | 10169 | -845  | 52    |
| H(18B) | 1174 | 9798  | -1624 | 52    |
| H(19A) | 2450 | 8439  | -648  | 63    |
| H(19B) | 1532 | 8794  | -92   | 63    |
| H(20A) | 4523 | 8656  | 1120  | 53    |
| H(20B) | 4671 | 9527  | 555   | 53    |
| H(16C) | 3157 | 11025 | 1065  | 47    |
| H(16D) | 1653 | 10501 | 863   | 47    |
| H(17C) | 2426 | 11067 | -561  | 58    |
| H(17D) | 801  | 10686 | -764  | 58    |
| H(18C) | 1240 | 9408  | -1386 | 42    |
| H(18D) | 2830 | 9792  | -1207 | 42    |

|        |          |          |          |    |
|--------|----------|----------|----------|----|
| H(19C) | 3683     | 8697     | -534     | 77 |
| H(19D) | 2185     | 8444     | -471     | 77 |
| H(20C) | 4930     | 9064     | 992      | 60 |
| H(20D) | 3720     | 8443     | 1088     | 60 |
| H(1A)  | 4130(40) | 8290(20) | 5710(30) | 38 |
| H(4A)  | 5231     | 10341    | 2299     | 42 |

---

**Table 6.** Torsion angles [°] for compound **1o**.

---

|                         |            |
|-------------------------|------------|
| C(12)-C(1)-C(2)-C(3)    | -0.4(4)    |
| C(1)-C(2)-C(3)-C(4)     | 0.8(4)     |
| C(2)-C(3)-C(4)-C(13)    | -0.2(4)    |
| C(14)-C(6)-C(7)-C(8)    | 0.4(4)     |
| C(6)-C(7)-C(8)-C(9)     | 2.4(4)     |
| C(6)-C(7)-C(8)-Cl(1)    | -177.9(2)  |
| C(7)-C(8)-C(9)-N(3)     | -2.4(4)    |
| Cl(1)-C(8)-C(9)-N(3)    | 177.97(18) |
| N(4)-C(10)-C(11)-N(2)   | -178.9(2)  |
| N(3)-C(10)-C(11)-N(2)   | 0.1(3)     |
| N(4)-C(10)-C(11)-C(12)  | -0.7(5)    |
| N(3)-C(10)-C(11)-C(12)  | 178.3(2)   |
| C(2)-C(1)-C(12)-C(13)   | -0.4(4)    |
| C(2)-C(1)-C(12)-C(11)   | -179.1(2)  |
| C(10)-C(11)-C(12)-C(1)  | -2.3(4)    |
| N(2)-C(11)-C(12)-C(1)   | 175.7(2)   |
| C(10)-C(11)-C(12)-C(13) | 178.9(3)   |
| N(2)-C(11)-C(12)-C(13)  | -3.0(3)    |
| C(1)-C(12)-C(13)-N(1)   | -179.1(2)  |
| C(11)-C(12)-C(13)-N(1)  | -0.3(3)    |
| C(1)-C(12)-C(13)-C(4)   | 1.0(4)     |
| C(11)-C(12)-C(13)-C(4)  | 179.7(2)   |
| C(3)-C(4)-C(13)-N(1)    | 179.4(2)   |
| C(3)-C(4)-C(13)-C(12)   | -0.7(4)    |
| C(7)-C(6)-C(14)-N(3)    | -3.2(4)    |
| C(7)-C(6)-C(14)-N(2)    | -179.5(3)  |
| N(4)-C(15)-C(16)-C(17)  | -163.7(4)  |

|                             |           |
|-----------------------------|-----------|
| C(20)-C(15)-C(16)-C(17)     | 81.1(8)   |
| C(15)-C(16)-C(17)-C(18)     | -90.7(9)  |
| C(16)-C(17)-C(18)-C(19)     | 85.5(8)   |
| C(17)-C(18)-C(19)-C(20)     | -80.8(10) |
| N(4)-C(15)-C(20)-C(19)      | 172.4(5)  |
| C(16)-C(15)-C(20)-C(19)     | -79.9(9)  |
| C(18)-C(19)-C(20)-C(15)     | 76.4(10)  |
| C(16B)-C(17B)-C(18B)-C(19B) | -1(2)     |
| C(17B)-C(18B)-C(19B)-C(20B) | -14(2)    |
| O(1)-C(5)-N(1)-C(13)        | 179.6(3)  |
| N(2)-C(5)-N(1)-C(13)        | 0.4(4)    |
| C(12)-C(13)-N(1)-C(5)       | 1.7(4)    |
| C(4)-C(13)-N(1)-C(5)        | -178.3(3) |
| N(3)-C(14)-N(2)-C(11)       | -1.3(3)   |
| C(6)-C(14)-N(2)-C(11)       | 175.4(3)  |
| N(3)-C(14)-N(2)-C(5)        | 175.4(2)  |
| C(6)-C(14)-N(2)-C(5)        | -7.9(4)   |
| C(10)-C(11)-N(2)-C(14)      | 0.8(3)    |
| C(12)-C(11)-N(2)-C(14)      | -177.7(2) |
| C(10)-C(11)-N(2)-C(5)       | -175.9(2) |
| C(12)-C(11)-N(2)-C(5)       | 5.6(3)    |
| O(1)-C(5)-N(2)-C(14)        | 0.4(4)    |
| N(1)-C(5)-N(2)-C(14)        | 179.7(2)  |
| O(1)-C(5)-N(2)-C(11)        | 176.6(3)  |
| N(1)-C(5)-N(2)-C(11)        | -4.1(4)   |
| N(2)-C(14)-N(3)-C(9)        | -179.6(2) |
| C(6)-C(14)-N(3)-C(9)        | 3.3(4)    |
| N(2)-C(14)-N(3)-C(10)       | 1.4(3)    |
| C(6)-C(14)-N(3)-C(10)       | -175.8(2) |

|                        |           |
|------------------------|-----------|
| C(8)-C(9)-N(3)-C(14)   | -0.4(3)   |
| C(8)-C(9)-N(3)-C(10)   | 178.5(2)  |
| N(4)-C(10)-N(3)-C(14)  | 178.1(2)  |
| C(11)-C(10)-N(3)-C(14) | -0.9(3)   |
| N(4)-C(10)-N(3)-C(9)   | -0.9(4)   |
| C(11)-C(10)-N(3)-C(9)  | -179.9(2) |
| C(11)-C(10)-N(4)-C(15) | -85.6(3)  |
| N(3)-C(10)-N(4)-C(15)  | 95.6(3)   |
| C(20)-C(15)-N(4)-C(10) | -78.4(7)  |
| C(16)-C(15)-N(4)-C(10) | 178.2(4)  |

---

Symmetry transformations used to generate equivalent atoms:

**Table 7.** Hydrogen bonds for compound **1o** [ $\text{\AA}$  and  $^\circ$ ].

| D-H...A             | d(D-H)  | d(H...A) | d(D...A) | $\angle(\text{DHA})$ |
|---------------------|---------|----------|----------|----------------------|
| N(4)-H(4A)...O(3)#1 | 0.77    | 2.31     | 3.026(5) | 156.1                |
| N(1)-H(1A)...O(5)#2 | 0.84(3) | 2.22(4)  | 3.047(4) | 171(3)               |

Symmetry transformations used to generate equivalent atoms:

#1  $-x+1, y+1/2, -z+1/2$     #2  $x, -y+3/2, z+1/2$
